# Supplementary material for: Serum biomarkers discovery of steroid-induced femoral head osteonecrosis in Chinese female by comparative proteome
Source: Research Square preprint supplement (doi:10.21203/rs.3.rs-17162/v2), 2022-05-11
Supplement: Supplementary file 1 [file b592cd995da4fd4c7e3ac955.xlsx]

## Sheet: Sheet1
Protein	ProteinName	SONFH-vs-CK	SONFH-vs-CK-p	SONFH-vs-ONFH	SONFH-vs-ONFH-p
A0A0X9TD47	MS-D1 light chain variable region (Fragment) OS=Homo sapiens PE=2 SV=1	NA	NA	NA	NA
P07225	Vitamin K-dependent protein S OS=Homo sapiens GN=PROS1 PE=1 SV=1	1.03656	0.806137	1.00637	0.966044
P01603	Ig kappa chain V-I region Ka OS=Homo sapiens PE=1 SV=1	NA	NA	NA	NA
A0A0X9V9B3	MS-F1 light chain variable region (Fragment) OS=Homo sapiens PE=2 SV=1	0.903344	0.641414	1.13284	0.620635
A0A109PW41	GCT-A2 light chain variable region (Fragment) OS=Homo sapiens PE=2 SV=1	NA	NA	NA	NA
A0N7J6	REV25-2 (Fragment) OS=Homo sapiens PE=2 SV=1	1.37215	0.595685	1.26171	0.686027
P02760	Protein AMBP OS=Homo sapiens GN=AMBP PE=1 SV=1	1.22506	0.300946	1.07545	0.696525
P52798	Ephrin-A4 OS=Homo sapiens GN=EFNA4 PE=1 SV=1	1.82387	0.30973	1.50151	0.421027
P02743	Serum amyloid P-component OS=Homo sapiens GN=APCS PE=1 SV=2	1.17921	0.376659	1.04497	0.742073
Q9H637	cDNA: FLJ22628 fis, clone HSI06177 OS=Homo sapiens PE=2 SV=1	1.75998	NA	2.06662	NA
A0A0C4DH26	Protein IGKV6D-41 (Fragment) OS=Homo sapiens GN=IGKV6D-41 PE=4 SV=1	NA	NA	NA	NA
S6AP35	MHC class II antigen (Fragment) OS=Homo sapiens GN=HLA-DQB1 PE=3 SV=1	NA	NA	NA	NA
Q9H6S7	cDNA: FLJ21924 fis, clone HEP04086 OS=Homo sapiens PE=2 SV=1	NA	NA	NA	NA
P02679	Fibrinogen gamma chain OS=Homo sapiens GN=FGG PE=1 SV=3	0.616566	0.134561	0.77514	0.540327
P07195	L-lactate dehydrogenase B chain OS=Homo sapiens GN=LDHB PE=1 SV=2	1.55881	0.17196	1.28538	0.371255
A0A075B6N7	Ig alpha-2 chain C region (Fragment) OS=Homo sapiens GN=IGHA2 PE=1 SV=1	0.654778	NA	2.32775	NA
Q6N094	Putative uncharacterized protein DKFZp686O01196 OS=Homo sapiens GN=DKFZp686O01196 PE=2 SV=1	1.48028	NA	0.911908	NA
Q8IZZ5	Coagulation factor XII-Mie OS=Homo sapiens PE=2 SV=1	1.85301	NA	1.27809	NA
P08185	Corticosteroid-binding globulin OS=Homo sapiens GN=SERPINA6 PE=1 SV=1	0.974914	0.746118	0.951925	0.522699
Q06033	Inter-alpha-trypsin inhibitor heavy chain H3 OS=Homo sapiens GN=ITIH3 PE=1 SV=2	1.47783	0.0801615	1.11406	0.581246
O94988	Protein FAM13A OS=Homo sapiens GN=FAM13A PE=1 SV=2	NA	NA	NA	NA
P12111	Collagen alpha-3(VI) chain OS=Homo sapiens GN=COL6A3 PE=1 SV=5	NA	NA	NA	NA
Q6VN20	Ran-binding protein 10 OS=Homo sapiens GN=RANBP10 PE=1 SV=1	NA	NA	NA	NA
P01624	Ig kappa chain V-III region POM OS=Homo sapiens PE=1 SV=1	1.1019	0.788827	1.26376	0.546735
Q96JD2	Amyloid lambda 6 light chain variable region NEG (Fragment) OS=Homo sapiens PE=2 SV=1	1.68548	0.395897	1.60035	0.453121
B4DEG7	cDNA FLJ59238, highly similar to SNW domain-containing protein 1 OS=Homo sapiens PE=2 SV=1	NA	NA	NA	NA
Q96ME4	cDNA FLJ32471 fis, clone SKNMC2000322, highly similar to Peptidyl-tRNA hydrolase 2, mitochondrial (EC 3.1.1.29) OS=Homo sapiens PE=2 SV=2	NA	NA	NA	NA
P08779	Keratin, type I cytoskeletal 16 OS=Homo sapiens GN=KRT16 PE=1 SV=4	4.46637	NA	4.68339	NA
P98160	Basement membrane-specific heparan sulfate proteoglycan core protein OS=Homo sapiens GN=HSPG2 PE=1 SV=4	1.44669	0.500285	1.40557	0.527383
Q02388	Collagen alpha-1(VII) chain OS=Homo sapiens GN=COL7A1 PE=1 SV=2	NA	NA	NA	NA
P60709	Actin, cytoplasmic 1 OS=Homo sapiens GN=ACTB PE=1 SV=1	5.15804	0.158061	2.17637	0.427446
B4DEU7	cDNA FLJ56950, highly similar to Homo sapiens FCH domain only 2 (FCHO2), mRNA OS=Homo sapiens PE=2 SV=1	NA	NA	NA	NA
Q6EMK4	Vasorin OS=Homo sapiens GN=VASN PE=1 SV=1	0.924433	0.631635	0.83073	0.202318
P01611	Ig kappa chain V-I region Wes OS=Homo sapiens PE=1 SV=1	1.58651	0.441349	1.47073	0.489905
Q6P5S3	Uncharacterized protein OS=Homo sapiens PE=2 SV=1	NA	NA	NA	NA
Q92966	snRNA-activating protein complex subunit 3 OS=Homo sapiens GN=SNAPC3 PE=1 SV=1	NA	NA	NA	NA
K7EPF9	Apolipoprotein C-I OS=Homo sapiens GN=APOC1 PE=1 SV=1	NA	NA	NA	NA
P80108	Phosphatidylinositol-glycan-specific phospholipase D OS=Homo sapiens GN=GPLD1 PE=1 SV=3	0.971353	0.866376	1.02049	0.909381
A0A068LKQ2	Ig heavy chain variable region (Fragment) OS=Homo sapiens PE=2 SV=1	1.4546	0.19724	1.29872	0.350758
Q6MZX7	Putative uncharacterized protein DKFZp686M24218 OS=Homo sapiens GN=DKFZp686M24218 PE=2 SV=1	NA	NA	NA	NA
A0A0J9YWW6	MICOS complex subunit (Fragment) OS=Homo sapiens GN=APOO PE=1 SV=1	NA	NA	NA	NA
H0Y9M2	Zinc finger protein 827 (Fragment) OS=Homo sapiens GN=ZNF827 PE=1 SV=1	NA	NA	NA	NA
A0A0C4DH24	Protein IGKV6-21 (Fragment) OS=Homo sapiens GN=IGKV6-21 PE=1 SV=1	1.53391	0.542168	1.17044	0.794596
B1N7B6	Cryocrystalglobulin CC1 heavy chain variable region (Fragment) OS=Homo sapiens PE=2 SV=1	0.884136	0.424793	1.17042	0.247502
Q6EMB2	Tubulin polyglutamylase TTLL5 OS=Homo sapiens GN=TTLL5 PE=1 SV=3	NA	NA	NA	NA
Q9UNS1	Protein timeless homolog OS=Homo sapiens GN=TIMELESS PE=1 SV=2	NA	NA	NA	NA
L0R6K6	Alternative protein MTFP1 OS=Homo sapiens GN=MTFP1 PE=4 SV=1	NA	NA	NA	NA
E9PIM7	Protein HID1 OS=Homo sapiens GN=HID1 PE=1 SV=1	2.19122	NA	1.21098	NA
Q5EFE5	Anti-RhD monoclonal T125 gamma1 heavy chain OS=Homo sapiens PE=2 SV=1	NA	NA	NA	NA
Q15582	Transforming growth factor-beta-induced protein ig-h3 OS=Homo sapiens GN=TGFBI PE=1 SV=1	1.26429	0.221834	0.967566	0.785028
Q86YC2	Partner and localizer of BRCA2 OS=Homo sapiens GN=PALB2 PE=1 SV=1	NA	NA	NA	NA
Q99784	Noelin OS=Homo sapiens GN=OLFM1 PE=1 SV=4	NA	NA	NA	NA
A2JA19	Anti-mucin1 light chain variable region (Fragment) OS=Homo sapiens PE=2 SV=1	1.44393	0.306726	1.15862	0.63724
Q13018	Secretory phospholipase A2 receptor OS=Homo sapiens GN=PLA2R1 PE=1 SV=2	NA	NA	NA	NA
P06276	Cholinesterase OS=Homo sapiens GN=BCHE PE=1 SV=1	1.03585	NA	0.907817	0.611474
Q92820	Gamma-glutamyl hydrolase OS=Homo sapiens GN=GGH PE=1 SV=2	0.932301	0.681898	1.18009	0.268245
P00918	Carbonic anhydrase 2 OS=Homo sapiens GN=CA2 PE=1 SV=2	3.35829	NA	1.01215	NA
Q8IZ57	Neurensin-1 OS=Homo sapiens GN=NRSN1 PE=1 SV=1	NA	NA	NA	NA
P08571	Monocyte differentiation antigen CD14 OS=Homo sapiens GN=CD14 PE=1 SV=2	1.26127	0.0657466	1.30269	0.0440895
Q9NP78	ATP-binding cassette sub-family B member 9 OS=Homo sapiens GN=ABCB9 PE=1 SV=1	0.660952	0.211534	0.76594	0.51968
P02042	Hemoglobin subunit delta OS=Homo sapiens GN=HBD PE=1 SV=2	2.00761	0.388939	1.04835	0.941776
Q16195	Keratin (Fragment) OS=Homo sapiens GN=keratin PE=2 SV=1	NA	NA	NA	NA
Q9UL90	Myosin-reactive immunoglobulin heavy chain variable region (Fragment) OS=Homo sapiens PE=2 SV=1	1.29954	NA	0.301055	NA
A0A068LRX1	Ig heavy chain variable region (Fragment) OS=Homo sapiens PE=2 SV=1	0.541581	NA	1.22203	NA
P01606	Ig kappa chain V-I region OU OS=Homo sapiens PE=1 SV=1	1.61163	0.134859	1.44277	0.226197
P62906	60S ribosomal protein L10a OS=Homo sapiens GN=RPL10A PE=1 SV=2	0.87387	NA	0.810822	NA
Q29RW7	APOL1 protein (Fragment) OS=Homo sapiens GN=APOL1 PE=2 SV=1	1.25784	0.354955	1.15791	0.528556
A2J422	Anti-HER3 scFv (Fragment) OS=Homo sapiens PE=2 SV=1	1.13573	NA	1.22608	NA
B1N7B8	Cryocrystalglobulin CC1 kappa light chain variable region (Fragment) OS=Homo sapiens PE=2 SV=1	1.26787	0.623463	2.69726	0.15724
O75581	Low-density lipoprotein receptor-related protein 6 OS=Homo sapiens GN=LRP6 PE=1 SV=2	NA	NA	NA	NA
A0A087WZH9	Protein IGKV1-33 OS=Homo sapiens GN=IGKV1D-33 PE=1 SV=1	NA	NA	NA	NA
Q9NY35	Claudin domain-containing protein 1 OS=Homo sapiens GN=CLDND1 PE=1 SV=1	NA	NA	NA	NA
P06313	Ig kappa chain V-IV region JI OS=Homo sapiens PE=4 SV=1	2.66392	NA	2.87722	NA
P02763	Alpha-1-acid glycoprotein 1 OS=Homo sapiens GN=ORM1 PE=1 SV=1	1.64821	0.0220255	1.32202	0.188688
P02766	Transthyretin OS=Homo sapiens GN=TTR PE=1 SV=1	0.9691	0.756444	1.02033	0.842541
P00736	Complement C1r subcomponent OS=Homo sapiens GN=C1R PE=1 SV=2	0.854679	0.211319	1.12742	0.393609
C9JY41	Germinal center-associated-signaling and motility protein (Fragment) OS=Homo sapiens GN=GCSAM PE=1 SV=7	NA	NA	NA	NA
Q9NQZ6	Zinc finger C4H2 domain-containing protein OS=Homo sapiens GN=ZC4H2 PE=1 SV=1	NA	NA	NA	NA
Q7Z699	Sprouty-related, EVH1 domain-containing protein 1 OS=Homo sapiens GN=SPRED1 PE=1 SV=2	NA	NA	NA	NA
P51884	Lumican OS=Homo sapiens GN=LUM PE=1 SV=2	0.827111	0.136535	0.867794	0.138074
I1VEE1	ABO glycosyltransferase (Fragment) OS=Homo sapiens GN=ABO PE=4 SV=1	NA	NA	NA	NA
A2IPI5	HRV Fab 026-VL (Fragment) OS=Homo sapiens PE=2 SV=1	0.836976	0.638272	1.37626	0.504492
Q9NQW1	Protein transport protein Sec31B OS=Homo sapiens GN=SEC31B PE=1 SV=1	NA	NA	NA	NA
Q6ZS72	Putative uncharacterized protein C19orf35 OS=Homo sapiens GN=C19orf35 PE=2 SV=1	NA	NA	NA	NA
P23497	Nuclear autoantigen Sp-100 OS=Homo sapiens GN=SP100 PE=1 SV=3	NA	NA	NA	NA
A0A0X9T7V9	GCT-A4 light chain variable region (Fragment) OS=Homo sapiens PE=2 SV=1	NA	NA	NA	NA
Q9ULX7	Carbonic anhydrase 14 OS=Homo sapiens GN=CA14 PE=1 SV=1	NA	NA	NA	NA
P08603	Complement factor H OS=Homo sapiens GN=CFH PE=1 SV=4	0.941974	0.735377	0.828591	0.262736
P52209	6-phosphogluconate dehydrogenase, decarboxylating OS=Homo sapiens GN=PGD PE=1 SV=3	6.30301	NA	NA	NA
A2NKM7	NANUC-2 heavy chain (Fragment) OS=Homo sapiens PE=2 SV=1	0.477573	NA	0.641844	NA
H0Y9A0	Long-chain-fatty-acid--CoA ligase 4 (Fragment) OS=Homo sapiens GN=ACSL4 PE=1 SV=1	NA	NA	NA	NA
Q9UNU2	Complement protein C4B frameshift mutant (Fragment) OS=Homo sapiens GN=C4B PE=4 SV=1	0.792906	NA	1.16471	0.798635
Q86YW9	Mediator of RNA polymerase II transcription subunit 12-like protein OS=Homo sapiens GN=MED12L PE=1 SV=2	NA	NA	NA	NA
Q04756	Hepatocyte growth factor activator OS=Homo sapiens GN=HGFAC PE=1 SV=1	1.00351	0.985661	1.0043	0.983544
P38606	V-type proton ATPase catalytic subunit A OS=Homo sapiens GN=ATP6V1A PE=1 SV=2	NA	NA	NA	NA
P04211	Ig lambda chain V region 4A OS=Homo sapiens PE=4 SV=1	1.92506	0.120106	3.42376	0.0437426
Q76L82	Additional sex combs like 1 (Drosophila), isoform CRA_d OS=Homo sapiens GN=ASXH1 PE=1 SV=1	NA	NA	NA	NA
A0A0C4DH36	Protein IGHV3-38 (Fragment) OS=Homo sapiens GN=IGHV3-38 PE=1 SV=1	0.917005	0.6997	1.01779	0.949258
Q6PIL8	IGK@ protein OS=Homo sapiens GN=IGK@ PE=1 SV=1	1.89554	0.353338	2.2552	0.26587
P04406	Glyceraldehyde-3-phosphate dehydrogenase OS=Homo sapiens GN=GAPDH PE=1 SV=3	2.36707	NA	2.18398	NA
P02675	Fibrinogen beta chain OS=Homo sapiens GN=FGB PE=1 SV=2	0.677143	NA	0.72058	0.488885
Q13790	Apolipoprotein F OS=Homo sapiens GN=APOF PE=1 SV=2	1.06968	0.838339	1.33367	0.439299
Q86Z09	FGA protein (Fragment) OS=Homo sapiens GN=FGA PE=4 SV=1	1.35183	NA	0.937953	NA
S6C4Q9	IgG L chain OS=Homo sapiens PE=2 SV=1	1.28806	NA	1.29921	NA
P18206	Vinculin OS=Homo sapiens GN=VCL PE=1 SV=4	4.41176	NA	3.26087	NA
Q6PIM1	WDFY4 protein OS=Homo sapiens GN=WDFY4 PE=2 SV=1	NA	NA	NA	NA
Q7Z7Q0	APOB protein OS=Homo sapiens GN=APOB PE=2 SV=1	13.9314	NA	14.6495	NA
A2N2F4	VK3 protein (Fragment) OS=Homo sapiens GN=VK3 PE=2 SV=1	0.62486	0.310212	1.2898	0.0418291
A2JA14	Anti-mucin1 heavy chain variable region (Fragment) OS=Homo sapiens PE=2 SV=1	NA	NA	NA	NA
P35579	Myosin-9 OS=Homo sapiens GN=MYH9 PE=1 SV=4	NA	NA	NA	NA
Q6MZX9	Putative uncharacterized protein DKFZp686M08189 OS=Homo sapiens GN=DKFZp686M08189 PE=2 SV=1	0.898608	NA	1.04147	NA
P07202	Thyroid peroxidase OS=Homo sapiens GN=TPO PE=1 SV=4	NA	NA	NA	NA
A0A109PW50	IBM-B3 heavy chain variable region (Fragment) OS=Homo sapiens PE=2 SV=1	NA	NA	NA	NA
P01762	Ig heavy chain V-III region TRO OS=Homo sapiens PE=1 SV=1	1.5828	0.275196	1.88862	0.183662
P01861	Ig gamma-4 chain C region OS=Homo sapiens GN=IGHG4 PE=1 SV=1	NA	NA	NA	NA
A0A068LKR4	Ig heavy chain variable region (Fragment) OS=Homo sapiens PE=2 SV=1	NA	NA	NA	NA
A0A096LPE2	Protein SAA2-SAA4 OS=Homo sapiens GN=SAA2-SAA4 PE=4 SV=1	0.94354	0.8314	0.973704	0.91067
Q65ZC9	Single-chain Fv (Fragment) OS=Homo sapiens GN=scFv PE=2 SV=1	NA	NA	NA	NA
P68871	Hemoglobin subunit beta OS=Homo sapiens GN=HBB PE=1 SV=2	1.76727	0.266123	1.09407	0.81855
P0CF74	Ig lambda-6 chain C region OS=Homo sapiens GN=IGLC6 PE=4 SV=1	NA	NA	NA	NA
B2R8I2	cDNA, FLJ93914, highly similar to Homo sapiens histidine-rich glycoprotein (HRG), mRNA OS=Homo sapiens PE=2 SV=1	0.857627	0.301075	1.04417	0.766882
Q5FWF9	IGL@ protein OS=Homo sapiens GN=IGL@ PE=1 SV=1	2.25033	NA	1.48644	NA
A2J1N5	Rheumatoid factor RF-ET6 (Fragment) OS=Homo sapiens PE=2 SV=1	1.24517	0.336156	1.26457	0.322291
B7Z1F8	cDNA FLJ53025, highly similar to Complement C4-B OS=Homo sapiens PE=2 SV=1	0.886104	0.786166	0.503377	0.100946
O94925	Glutaminase kidney isoform, mitochondrial OS=Homo sapiens GN=GLS PE=1 SV=1	NA	NA	NA	NA
Q99523	Sortilin OS=Homo sapiens GN=SORT1 PE=1 SV=3	NA	NA	NA	NA
A0A087WWV8	Protein IGKV1-12 OS=Homo sapiens GN=IGKV1-12 PE=1 SV=2	NA	NA	NA	NA
Q6T310	Ras-like protein family member 11A OS=Homo sapiens GN=RASL11A PE=2 SV=1	NA	NA	NA	NA
P06317	Ig lambda chain V-VI region SUT OS=Homo sapiens PE=1 SV=1	1.27059	0.401923	1.2354	0.506861
Q6NUN7	Uncharacterized protein C11orf63 OS=Homo sapiens GN=C11orf63 PE=2 SV=1	NA	NA	NA	NA
D3DP16	Fibrinogen gamma chain, isoform CRA_a OS=Homo sapiens GN=FGG PE=4 SV=1	1.83211	NA	6.06446	NA
A2NXP9	K light chain variable region (Fragment) OS=Homo sapiens PE=2 SV=1	1.31722	0.627496	1.73517	0.396236
A0A087WXX7	Lysozyme-like protein 6 (Fragment) OS=Homo sapiens GN=LYZL6 PE=1 SV=1	NA	NA	NA	NA
O15145	Actin-related protein 2/3 complex subunit 3 OS=Homo sapiens GN=ARPC3 PE=1 SV=3	NA	NA	NA	NA
O75445	Usherin OS=Homo sapiens GN=USH2A PE=1 SV=3	NA	NA	NA	NA
C9JSR0	Sulfotransferase (Fragment) OS=Homo sapiens GN=SULT1C2 PE=1 SV=1	NA	NA	NA	NA
Q6ZNR1	cDNA FLJ27309 fis, clone TMS06203 OS=Homo sapiens PE=2 SV=1	1.05515	NA	0.847679	NA
Q9HCC1	Single chain Fv (Fragment) OS=Homo sapiens PE=1 SV=1	0.983824	0.934672	1.86075	0.0191494
A0A109PP82	MS-C2 light chain variable region (Fragment) OS=Homo sapiens PE=2 SV=1	1.78713	0.144213	1.15152	0.66715
Q6MZQ6	Putative uncharacterized protein DKFZp686G11190 OS=Homo sapiens GN=DKFZp686G11190 PE=2 SV=1	0.91	0.462792	1.13815	0.420772
P01619	Ig kappa chain V-III region B6 OS=Homo sapiens PE=1 SV=1	1.10057	0.767197	1.39296	0.331399
Q6MZV7	Putative uncharacterized protein DKFZp686C11235 OS=Homo sapiens GN=DKFZp686C11235 PE=2 SV=1	0.508603	0.432992	0.549118	0.402338
B6EDE2	Epididymis luminal protein 180 (Fragment) OS=Homo sapiens GN=HEL180 PE=2 SV=1	1.47783	0.265522	1.53538	0.23338
O43386	KIA001LB (Fragment) OS=Homo sapiens GN=KIA001LB PE=4 SV=1	NA	NA	NA	NA
Q99653	Calcineurin B homologous protein 1 OS=Homo sapiens GN=CHP1 PE=1 SV=3	NA	NA	NA	NA
A0A0X9TD88	GCT-A3 heavy chain variable region (Fragment) OS=Homo sapiens PE=2 SV=1	NA	NA	NA	NA
P19961	Alpha-amylase 2B OS=Homo sapiens GN=AMY2B PE=1 SV=1	NA	NA	NA	NA
Q8N6C8	Leukocyte immunoglobulin-like receptor subfamily A member 3 OS=Homo sapiens GN=LILRA3 PE=1 SV=3	0.931915	NA	0.98427	NA
A0A125QYY9	IBM-B2 heavy chain variable region (Fragment) OS=Homo sapiens PE=2 SV=1	1.12086	0.629885	1.30195	0.275965
A6NDZ3	cDNA FLJ51783, highly similar to SAM domain and HD domain-containing protein 1 OS=Homo sapiens PE=2 SV=2	NA	NA	NA	NA
B4DM56	cDNA FLJ58744, highly similar to Serine/threonine-protein kinase Nek11 (EC 2.7.11.1) OS=Homo sapiens PE=2 SV=1	NA	NA	NA	NA
P01622	Ig kappa chain V-III region Ti OS=Homo sapiens PE=1 SV=1	0.740518	NA	0.500625	NA
P0C869	Cytosolic phospholipase A2 beta OS=Homo sapiens GN=PLA2G4B PE=1 SV=2	NA	NA	NA	NA
P01591	Immunoglobulin J chain OS=Homo sapiens GN=JCHAIN PE=1 SV=4	0.819483	0.250744	1.15011	NA
P60985	Keratinocyte differentiation-associated protein OS=Homo sapiens GN=KRTDAP PE=1 SV=1	0.679958	0.00118995	0.889891	0.639347
H0Y8L3	Transforming growth factor-beta-induced protein ig-h3 (Fragment) OS=Homo sapiens GN=TGFBI PE=1 SV=1	NA	NA	NA	NA
Q8NEP3	Dynein assembly factor 1, axonemal OS=Homo sapiens GN=DNAAF1 PE=1 SV=5	NA	NA	NA	NA
P06331	Ig heavy chain V-II region ARH-77 OS=Homo sapiens PE=4 SV=1	NA	NA	NA	NA
Q7L294	SAPS3 protein (Fragment) OS=Homo sapiens GN=SAPS3 PE=2 SV=1	NA	NA	NA	NA
A0A087WXL8	Ig gamma-3 chain C region OS=Homo sapiens GN=IGHG3 PE=1 SV=1	1.05902	0.788701	1.61313	0.107774
P16035	Metalloproteinase inhibitor 2 OS=Homo sapiens GN=TIMP2 PE=1 SV=2	NA	NA	NA	NA
P01620	Ig kappa chain V-III region SIE OS=Homo sapiens PE=1 SV=1	1.56198	NA	1.27358	NA
P00740	Coagulation factor IX OS=Homo sapiens GN=F9 PE=1 SV=2	1.07979	0.380648	0.909606	0.388969
A0N5G7	Rheumatoid factor D5 heavy chain (Fragment) OS=Homo sapiens GN=VH3 PE=2 SV=1	NA	NA	NA	NA
O14786	Neuropilin-1 OS=Homo sapiens GN=NRP1 PE=1 SV=3	3	NA	2.84115	NA
C9JAJ6	Butyrophilin subfamily 2 member A2 (Fragment) OS=Homo sapiens GN=BTN2A2 PE=4 SV=1	NA	NA	NA	NA
Q8NF12	FLJ00390 protein (Fragment) OS=Homo sapiens GN=FLJ00390 PE=2 SV=1	NA	NA	NA	NA
A2N0T3	VH6DJ protein (Fragment) OS=Homo sapiens GN=VH6DJ PE=2 SV=1	NA	NA	NA	NA
Q5NV88	V1-22 protein (Fragment) OS=Homo sapiens GN=V1-22 PE=1 SV=1	5.40571	NA	1.2431	NA
Q8NCL6	cDNA FLJ90170 fis, clone MAMMA1000370, highly similar to Ig alpha-1 chain C region OS=Homo sapiens PE=2 SV=1	1.10392	0.837069	1.30502	0.618146
P54108	Cysteine-rich secretory protein 3 OS=Homo sapiens GN=CRISP3 PE=1 SV=1	NA	NA	NA	NA
Q8WYL5	Protein phosphatase Slingshot homolog 1 OS=Homo sapiens GN=SSH1 PE=1 SV=2	NA	NA	NA	NA
Q4FEB5	Chymase 1 preproprotein transcript I (Fragment) OS=Homo sapiens GN=CMA1 PE=2 SV=1	NA	NA	NA	NA
Q9Y509	VH3 protein (Fragment) OS=Homo sapiens GN=VH3 PE=2 SV=1	1.76221	NA	2.30556	NA
Q8NEN0	Armadillo repeat-containing protein 2 OS=Homo sapiens GN=ARMC2 PE=2 SV=4	NA	NA	NA	NA
F4MH43	Ubiquitously transcribed tetratricopeptide repeat protein Y-linked transcript variant 4 OS=Homo sapiens GN=UTY PE=2 SV=1	NA	NA	NA	NA
S6C4R6	IgG L chain OS=Homo sapiens PE=2 SV=1	NA	NA	NA	NA
P22352	Glutathione peroxidase 3 OS=Homo sapiens GN=GPX3 PE=1 SV=2	1.27938	0.200107	1.07282	0.674998
O95185	Netrin receptor UNC5C OS=Homo sapiens GN=UNC5C PE=2 SV=2	NA	NA	NA	NA
O95273	Cyclin-D1-binding protein 1 OS=Homo sapiens GN=CCNDBP1 PE=1 SV=2	NA	NA	NA	NA
Q6GMX4	IGL@ protein OS=Homo sapiens GN=IGL@ PE=1 SV=1	NA	NA	NA	NA
Q5CZ94	Putative uncharacterized protein DKFZp781M0386 OS=Homo sapiens GN=DKFZp781M0386 PE=2 SV=1	1.03529	0.892449	0.780832	0.4277
Q7Z7G0	Target of Nesh-SH3 OS=Homo sapiens GN=ABI3BP PE=1 SV=1	NA	NA	NA	NA
G1FM94	Anti-Influenza A hemagglutinin heavy chain variable region (Fragment) OS=Homo sapiens PE=2 SV=1	1.29118	NA	1.45318	NA
P46439	Glutathione S-transferase Mu 5 OS=Homo sapiens GN=GSTM5 PE=1 SV=3	NA	NA	NA	NA
P24592	Insulin-like growth factor-binding protein 6 OS=Homo sapiens GN=IGFBP6 PE=1 SV=1	NA	NA	NA	NA
B4E1Z4	Uncharacterized protein OS=Homo sapiens PE=1 SV=1	1.0879	0.543993	0.994917	0.970092
Q16519	Protein S (Fragment) OS=Homo sapiens GN=PROS1 PE=4 SV=1	1.02659	NA	1.17238	NA
Q96PV1	KIAA1937 protein (Fragment) OS=Homo sapiens GN=KIAA1937 PE=2 SV=1	NA	NA	NA	NA
P01608	Ig kappa chain V-I region Roy OS=Homo sapiens PE=1 SV=1	1.20784	0.424284	1.26808	0.376191
F8W6L3	Kinesin light chain 1 OS=Homo sapiens GN=KLC1 PE=1 SV=1	NA	NA	NA	NA
Q9ULT0	Tetratricopeptide repeat protein 7A OS=Homo sapiens GN=TTC7A PE=1 SV=3	NA	NA	NA	NA
D6RF35	Vitamin D-binding protein OS=Homo sapiens GN=GC PE=1 SV=1	1.95473	0.381066	0.870582	0.755162
A0M8Q6	Ig lambda-7 chain C region OS=Homo sapiens GN=IGLC7 PE=4 SV=2	2.10219	NA	1.96085	NA
P06727	Apolipoprotein A-IV OS=Homo sapiens GN=APOA4 PE=1 SV=3	0.935025	0.6271	0.976624	0.862734
P05160	Coagulation factor XIII B chain OS=Homo sapiens GN=F13B PE=1 SV=3	0.959229	0.6627	1.1231	0.240227
P49454	Centromere protein F OS=Homo sapiens GN=CENPF PE=1 SV=2	NA	NA	NA	NA
P40189	Interleukin-6 receptor subunit beta OS=Homo sapiens GN=IL6ST PE=1 SV=2	1.08364	NA	1.1503	NA
P01778	Ig heavy chain V-III region ZAP OS=Homo sapiens PE=1 SV=1	1.06692	0.73462	1.45573	0.139881
Q6N089	Uncharacterized protein OS=Homo sapiens GN=DKFZp686P15220 PE=1 SV=1	NA	NA	NA	NA
Q96NL8	Protein C8orf37 OS=Homo sapiens GN=C8orf37 PE=1 SV=1	NA	NA	NA	NA
A0A0X9UWJ6	MS-B1 light chain variable region (Fragment) OS=Homo sapiens PE=2 SV=1	NA	NA	NA	NA
A0A0X9T0I7	IBM-A2 light chain variable region (Fragment) OS=Homo sapiens PE=2 SV=1	NA	NA	NA	NA
H7C276	Phosphoinositide phospholipase C (Fragment) OS=Homo sapiens GN=PLCL2 PE=1 SV=1	2.08634	NA	2.5679	NA
P30041	Peroxiredoxin-6 OS=Homo sapiens GN=PRDX6 PE=1 SV=3	NA	NA	NA	NA
M0R163	Galectin (Fragment) OS=Homo sapiens GN=LGALS14 PE=4 SV=1	0.749482	NA	0.502429	NA
Q9UL86	Myosin-reactive immunoglobulin kappa chain variable region (Fragment) OS=Homo sapiens PE=2 SV=1	NA	NA	NA	NA
A0A109PPC2	GCT-A7 light chain variable region (Fragment) OS=Homo sapiens PE=2 SV=1	NA	NA	NA	NA
Q02985	Complement factor H-related protein 3 OS=Homo sapiens GN=CFHR3 PE=1 SV=2	NA	NA	NA	NA
P10643	Complement component C7 OS=Homo sapiens GN=C7 PE=1 SV=2	1.25486	0.411548	1.24303	0.444316
H0YB43	Proton-coupled amino acid transporter 2 (Fragment) OS=Homo sapiens GN=SLC36A2 PE=1 SV=1	NA	NA	NA	NA
P12259	Coagulation factor V OS=Homo sapiens GN=F5 PE=1 SV=4	0.949096	0.71382	1.01537	0.919258
A8K5M0	cDNA FLJ78346, highly similar to Homo sapiens 3-hydroxybutyrate dehydrogenase, type 2, mRNA OS=Homo sapiens PE=2 SV=1	NA	NA	NA	NA
P63261	Actin, cytoplasmic 2 OS=Homo sapiens GN=ACTG1 PE=1 SV=1	2.006	0.235743	1.83739	0.272241
A0A0B4J1X8	Protein IGHV3-43 (Fragment) OS=Homo sapiens GN=IGHV3-43 PE=1 SV=1	1.46998	0.152006	1.57293	0.144846
A8K5T0	cDNA FLJ75416, highly similar to Homo sapiens complement factor H (CFH), mRNA OS=Homo sapiens PE=2 SV=1	0.384039	0.115744	0.819518	0.716604
Q52LW3	Rho GTPase-activating protein 29 OS=Homo sapiens GN=ARHGAP29 PE=1 SV=2	NA	NA	NA	NA
E9PI03	Vacuolar protein sorting-associated protein 52 homolog OS=Homo sapiens GN=VPS52 PE=1 SV=1	NA	NA	NA	NA
Q8IY84	Serine/threonine-protein kinase NIM1 OS=Homo sapiens GN=NIM1K PE=1 SV=1	1.96681	NA	0.907609	NA
P14780	Matrix metalloproteinase-9 OS=Homo sapiens GN=MMP9 PE=1 SV=3	NA	NA	NA	NA
Q86TT1	Full-length cDNA clone CS0DD006YL02 of Neuroblastoma of Homo sapiens (human) OS=Homo sapiens PE=2 SV=1	0.707502	0.601745	1.47781	0.560114
B4E035	cDNA FLJ56186 OS=Homo sapiens PE=2 SV=1	NA	NA	NA	NA
Q9H0A0	RNA cytidine acetyltransferase OS=Homo sapiens GN=NAT10 PE=1 SV=2	NA	NA	NA	NA
O95450	A disintegrin and metalloproteinase with thrombospondin motifs 2 OS=Homo sapiens GN=ADAMTS2 PE=2 SV=2	NA	NA	NA	NA
P01613	Ig kappa chain V-I region Ni OS=Homo sapiens PE=1 SV=1	1.36507	NA	1.1791	0.383213
P02750	Leucine-rich alpha-2-glycoprotein OS=Homo sapiens GN=LRG1 PE=1 SV=2	1.43943	0.0700958	1.25807	0.279632
P01596	Ig kappa chain V-I region CAR OS=Homo sapiens PE=1 SV=1	1.27411	0.535693	1.40707	0.439913
Q0ZCI6	Immunglobulin heavy chain variable region (Fragment) OS=Homo sapiens PE=4 SV=1	0.747121	0.144221	1.02672	0.912852
O95445	Apolipoprotein M OS=Homo sapiens GN=APOM PE=1 SV=2	0.753098	0.345894	1.02884	0.91516
A0A0F7TAV4	IGHV5-51 protein (Fragment) OS=Homo sapiens GN=IGHV5-51 PE=4 SV=1	NA	NA	NA	NA
Q96PF6	Kappa 1 light chain variable region (Fragment) OS=Homo sapiens GN=SDNK1 PE=4 SV=1	NA	NA	NA	NA
P08519	Apolipoprotein(a) OS=Homo sapiens GN=LPA PE=1 SV=1	0.599729	0.148982	0.949009	0.850932
P13987	CD59 glycoprotein OS=Homo sapiens GN=CD59 PE=1 SV=1	3.31373	NA	3.40807	NA
A0A068LN03	Ig heavy chain variable region (Fragment) OS=Homo sapiens PE=2 SV=1	1.16916	0.740353	1.37462	0.530046
H0YAK2	Inorganic pyrophosphatase 2, mitochondrial (Fragment) OS=Homo sapiens GN=PPA2 PE=1 SV=1	NA	NA	NA	NA
Q9P2P6	StAR-related lipid transfer protein 9 OS=Homo sapiens GN=STARD9 PE=1 SV=3	NA	NA	NA	NA
S6AWE6	IgG L chain OS=Homo sapiens PE=2 SV=1	0.406832	NA	0.559829	NA
P27797	Calreticulin OS=Homo sapiens GN=CALR PE=1 SV=1	4.01501	NA	3.67269	NA
Q6PJF2	IGK@ protein OS=Homo sapiens GN=IGK@ PE=1 SV=1	NA	NA	NA	NA
A4D1R6	Similar to 60S ribosomal protein L17 (L23) (Amino acid starvation-induced protein) (ASI) OS=Homo sapiens GN=LOC402695 PE=3 SV=1	NA	NA	NA	NA
Q5NV89	V1-7 protein (Fragment) OS=Homo sapiens GN=V1-7 PE=4 SV=1	NA	NA	NA	NA
Q53H53	Flavin containing monooxygenase 5 variant (Fragment) OS=Homo sapiens PE=2 SV=1	NA	NA	NA	NA
A4GXA9	Probable crossover junction endonuclease EME2 OS=Homo sapiens GN=EME2 PE=1 SV=3	NA	NA	NA	NA
A0A096LPB0	EPM2A-interacting protein 1 (Fragment) OS=Homo sapiens GN=EPM2AIP1 PE=1 SV=1	NA	NA	NA	NA
A0A0X9UWM4	IBM-A3 heavy chain variable region (Fragment) OS=Homo sapiens PE=2 SV=1	1.74176	0.420998	1.87378	0.391484
A0A0U1RVJ2	Protein IGKV1-37 (Fragment) OS=Homo sapiens GN=IGKV1-37 PE=4 SV=1	1.02302	NA	0.721827	NA
Q6GMW3	IGL@ protein OS=Homo sapiens GN=IGL@ PE=1 SV=1	NA	NA	NA	NA
P24158	Myeloblastin OS=Homo sapiens GN=PRTN3 PE=1 SV=3	0.637811	NA	0.650101	NA
A2NKM6	NANUC-1 heavy chain (Fragment) OS=Homo sapiens PE=2 SV=1	0.694218	0.538937	0.623149	0.389938
P05156	Complement factor I OS=Homo sapiens GN=CFI PE=1 SV=2	1.07115	0.418691	1.00388	0.96128
A0A0C4DH32	Protein IGHV3-20 (Fragment) OS=Homo sapiens GN=IGHV3-20 PE=1 SV=1	1.02098	NA	0.880254	NA
H7BZJ3	Protein disulfide-isomerase A3 (Fragment) OS=Homo sapiens GN=PDIA3 PE=1 SV=1	1.00781	0.965688	1.39711	0.160024
Q9C0G6	Dynein heavy chain 6, axonemal OS=Homo sapiens GN=DNAH6 PE=2 SV=3	0.864865	NA	1.26733	NA
P06744	Glucose-6-phosphate isomerase OS=Homo sapiens GN=GPI PE=1 SV=4	0.868587	NA	1.43815	NA
A0A0U1RRD5	Pancreatic prohormone (Fragment) OS=Homo sapiens GN=PPY PE=1 SV=1	NA	NA	NA	NA
P36980	Complement factor H-related protein 2 OS=Homo sapiens GN=CFHR2 PE=1 SV=1	0.708172	0.212399	1.40388	0.0752425
Q9UL82	Myosin-reactive immunoglobulin light chain variable region (Fragment) OS=Homo sapiens PE=2 SV=1	NA	NA	NA	NA
Q6IPQ0	IGL@ protein OS=Homo sapiens GN=IGL@ PE=2 SV=1	NA	NA	NA	NA
P07360	Complement component C8 gamma chain OS=Homo sapiens GN=C8G PE=1 SV=3	0.881948	0.450291	0.827603	0.220695
P04217	Alpha-1B-glycoprotein OS=Homo sapiens GN=A1BG PE=1 SV=4	1.01121	0.862043	1.01247	0.852353
A0A0J9YVU5	Protein IGHV2-70 (Fragment) OS=Homo sapiens GN=IGHV2-70 PE=4 SV=1	2.99799	NA	2.28296	NA
Q8N159	N-acetylglutamate synthase, mitochondrial OS=Homo sapiens GN=NAGS PE=1 SV=1	NA	NA	NA	NA
A2NB44	Cold agglutinin FS-2 H-chain (Fragment) OS=Homo sapiens GN=IGH@ PE=2 SV=1	1.13731	0.401339	0.783245	0.113916
A2NYU9	Heavy chain Fab (Fragment) OS=Homo sapiens PE=2 SV=1	2.24091	0.109077	2.55119	0.084066
K7EP36	Galectin-3-binding protein (Fragment) OS=Homo sapiens GN=LGALS3BP PE=1 SV=1	NA	NA	NA	NA
P20142	Gastricsin OS=Homo sapiens GN=PGC PE=1 SV=1	NA	NA	NA	NA
P22692	Insulin-like growth factor-binding protein 4 OS=Homo sapiens GN=IGFBP4 PE=1 SV=2	1.88932	0.585928	1.70606	0.632855
P00995	Serine protease inhibitor Kazal-type 1 OS=Homo sapiens GN=SPINK1 PE=1 SV=2	5.30809	NA	5.19285	NA
P01617	Ig kappa chain V-II region TEW OS=Homo sapiens PE=1 SV=1	1.75079	NA	2.89974	NA
P05452	Tetranectin OS=Homo sapiens GN=CLEC3B PE=1 SV=3	0.734326	0.0535735	0.944316	0.674686
Q8NEZ4	Histone-lysine N-methyltransferase 2C OS=Homo sapiens GN=KMT2C PE=1 SV=3	NA	NA	NA	NA
B3KTS7	cDNA FLJ38672 fis, clone HSYRA2000371, moderately similar to Insulin-like growth factor-binding protein 3 OS=Homo sapiens PE=2 SV=1	NA	NA	NA	NA
O95978	VH1 protein (Fragment) OS=Homo sapiens GN=VH1 PE=4 SV=1	NA	NA	NA	NA
Q9BXN2	C-type lectin domain family 7 member A OS=Homo sapiens GN=CLEC7A PE=1 SV=1	NA	NA	NA	NA
H0YBC1	Leptin receptor overlapping transcript-like 1 (Fragment) OS=Homo sapiens GN=LEPROTL1 PE=1 SV=1	NA	NA	NA	NA
P02745	Complement C1q subcomponent subunit A OS=Homo sapiens GN=C1QA PE=1 SV=2	1.24749	0.438653	1.1813	0.584176
O00391	Sulfhydryl oxidase 1 OS=Homo sapiens GN=QSOX1 PE=1 SV=3	0.768506	0.0377175	0.874292	0.238312
P01034	Cystatin-C OS=Homo sapiens GN=CST3 PE=1 SV=1	1.26351	0.67107	1.3785	0.581931
Q5NV65	V1-5 protein (Fragment) OS=Homo sapiens GN=V1-5 PE=4 SV=1	1.27896	0.458072	1.51087	0.269413
P01605	Ig kappa chain V-I region Lay OS=Homo sapiens PE=1 SV=1	2.11709	0.300656	1.45909	0.529687
A2KUC4	UGa8L (Fragment) OS=Homo sapiens GN=IGLV PE=4 SV=1	NA	NA	NA	NA
P27169	Serum paraoxonase/arylesterase 1 OS=Homo sapiens GN=PON1 PE=1 SV=3	0.926048	0.525861	0.94213	0.642546
Q9NPP6	Immunoglobulin heavy chain variant (Fragment) OS=Homo sapiens PE=2 SV=1	1.26322	NA	1.19214	NA
A2IPI6	HRV Fab 027-VL (Fragment) OS=Homo sapiens PE=2 SV=1	1.67714	0.545037	1.57341	0.586756
Q5NV69	V1-13 protein (Fragment) OS=Homo sapiens GN=V1-13 PE=4 SV=1	1.25331	NA	1.27948	NA
Q8IWL9	Cholesteryl ester transfer protein (Fragment) OS=Homo sapiens GN=CETP PE=4 SV=1	NA	NA	NA	NA
Q9BW62	Katanin p60 ATPase-containing subunit A-like 1 OS=Homo sapiens GN=KATNAL1 PE=1 SV=1	NA	NA	NA	NA
Q9P0B2	HSPC269 (Fragment) OS=Homo sapiens PE=2 SV=1	NA	NA	NA	NA
Q569I7	Uncharacterized protein OS=Homo sapiens PE=2 SV=1	1.65527	NA	1.23975	NA
P01042	Kininogen-1 OS=Homo sapiens GN=KNG1 PE=1 SV=2	0.969591	0.892523	0.770344	0.207995
A2NYU7	Heavy chain Fab (Fragment) OS=Homo sapiens PE=2 SV=1	1.51109	0.0699813	0.894602	0.702255
J9ZVQ3	Apolipoprotein E (Fragment) OS=Homo sapiens GN=APOE PE=3 SV=1	NA	NA	NA	NA
P01625	Ig kappa chain V-IV region Len OS=Homo sapiens PE=1 SV=2	3.18065	0.564578	3.0394	0.572443
P01833	Polymeric immunoglobulin receptor OS=Homo sapiens GN=PIGR PE=1 SV=4	1.55205	0.382487	1.47459	0.431393
P05090	Apolipoprotein D OS=Homo sapiens GN=APOD PE=1 SV=1	1.25488	0.448932	1.40156	0.264968
Q7L5A3	Protein FAM214B OS=Homo sapiens GN=FAM214B PE=1 SV=1	NA	NA	NA	NA
O76021	Ribosomal L1 domain-containing protein 1 OS=Homo sapiens GN=RSL1D1 PE=1 SV=3	NA	NA	NA	NA
O43379	WD repeat-containing protein 62 OS=Homo sapiens GN=WDR62 PE=1 SV=4	NA	NA	NA	NA
A0A087X079	Ig gamma-1 chain C region OS=Homo sapiens GN=IGHG1 PE=1 SV=1	NA	NA	NA	NA
P01854	Ig epsilon chain C region OS=Homo sapiens GN=IGHE PE=1 SV=1	NA	NA	NA	NA
Q5HYG9	Putative uncharacterized protein DKFZp686D23201 (Fragment) OS=Homo sapiens GN=DKFZp686D23201 PE=2 SV=1	NA	NA	NA	NA
A0A087WYJ9	Ig mu chain C region OS=Homo sapiens GN=IGHM PE=1 SV=1	0.524729	NA	1.08397	NA
P01008	Antithrombin-III OS=Homo sapiens GN=SERPINC1 PE=1 SV=1	0.829333	NA	1.07885	0.515043
Q9UL71	Myosin-reactive immunoglobulin heavy chain variable region (Fragment) OS=Homo sapiens PE=2 SV=1	NA	NA	NA	NA
A2KBC8	Anti-TeTox scFv (Fragment) OS=Homo sapiens PE=2 SV=1	1.19538	NA	0.831061	NA
B7Z737	cDNA FLJ52784, highly similar to Bcl-2-like 13 protein OS=Homo sapiens PE=2 SV=1	NA	NA	NA	NA
Q9UGH3	Solute carrier family 23 member 2 OS=Homo sapiens GN=SLC23A2 PE=1 SV=1	NA	NA	NA	NA
P03951	Coagulation factor XI OS=Homo sapiens GN=F11 PE=1 SV=1	0.869226	0.484757	0.937856	0.814465
O94953	Lysine-specific demethylase 4B OS=Homo sapiens GN=KDM4B PE=1 SV=4	NA	NA	NA	NA
H0YM46	Isocitrate dehydrogenase [NAD] subunit alpha, mitochondrial (Fragment) OS=Homo sapiens GN=IDH3A PE=1 SV=1	NA	NA	NA	NA
P01760	Ig heavy chain V-I region WOL OS=Homo sapiens PE=1 SV=1	NA	NA	NA	NA
A0A068LN13	Ig heavy chain variable region (Fragment) OS=Homo sapiens PE=2 SV=1	NA	NA	NA	NA
P69905	Hemoglobin subunit alpha OS=Homo sapiens GN=HBA1 PE=1 SV=2	1.66389	0.283359	0.853234	0.666591
A0A109PSY4	MS-A1 light chain variable region (Fragment) OS=Homo sapiens PE=2 SV=1	0.568029	NA	1.65736	NA
Q9NQ79	Cartilage acidic protein 1 OS=Homo sapiens GN=CRTAC1 PE=1 SV=2	1.1008	0.633387	1.19946	0.274852
Q8TCD0	Uncharacterized protein OS=Homo sapiens PE=1 SV=1	NA	NA	NA	NA
Q6MZU6	Putative uncharacterized protein DKFZp686C15213 OS=Homo sapiens GN=DKFZp686C15213 PE=2 SV=1	0.879146	NA	1.21054	0.628171
Q6ZP85	CDNA FLJ26301 fis, clone DMC07540 OS=Homo sapiens PE=2 SV=1	1.4085	0.438793	1.29279	0.536227
A0A087WVW2	Ig gamma-3 chain C region OS=Homo sapiens GN=IGHG3 PE=1 SV=1	2.21438	0.218844	2.98132	0.151768
A0A125U0V4	GCT-A2 heavy chain variable region (Fragment) OS=Homo sapiens PE=2 SV=1	NA	NA	NA	NA
Q8WV60	Pentatricopeptide repeat-containing protein 2, mitochondrial OS=Homo sapiens GN=PTCD2 PE=1 SV=3	NA	NA	NA	NA
Q7Z7M9	Polypeptide N-acetylgalactosaminyltransferase 5 OS=Homo sapiens GN=GALNT5 PE=1 SV=1	NA	NA	NA	NA
Q5NV81	V1-16 protein (Fragment) OS=Homo sapiens GN=V1-16 PE=4 SV=1	4.12814	NA	3.66216	NA
Q10588	ADP-ribosyl cyclase/cyclic ADP-ribose hydrolase 2 OS=Homo sapiens GN=BST1 PE=1 SV=2	1.08382	NA	1.0463	NA
A0A0X9V9C4	GCT-A8 heavy chain variable region (Fragment) OS=Homo sapiens PE=2 SV=1	1.39706	NA	0.48906	NA
S6B294	IgG L chain OS=Homo sapiens PE=2 SV=1	1.13424	NA	0.6439	NA
A0A109PW33	MS-C1 light chain variable region (Fragment) OS=Homo sapiens PE=2 SV=1	3.0012	NA	2.97619	NA
P02656	Apolipoprotein C-III OS=Homo sapiens GN=APOC3 PE=1 SV=1	1.46882	0.142567	1.43576	0.155547
Q7Z3T8	Zinc finger FYVE domain-containing protein 16 OS=Homo sapiens GN=ZFYVE16 PE=1 SV=3	NA	NA	NA	NA
Q86VY5	MYO3A protein OS=Homo sapiens GN=MYO3A PE=2 SV=1	NA	NA	NA	NA
P16157	Ankyrin-1 OS=Homo sapiens GN=ANK1 PE=1 SV=3	NA	NA	NA	NA
A0A0C4DH68	Protein IGKV2-24 (Fragment) OS=Homo sapiens GN=IGKV2-24 PE=1 SV=1	0.860312	0.744484	1.36667	0.574053
A0A0C4DH38	Protein IGHV5-51 (Fragment) OS=Homo sapiens GN=IGHV5-51 PE=1 SV=1	NA	NA	NA	NA
E7ESW6	WD repeat-containing protein 87 OS=Homo sapiens GN=WDR87 PE=1 SV=2	NA	NA	NA	NA
A0A0C4DH37	Protein IGHV3-48 (Fragment) OS=Homo sapiens GN=IGHV3-48 PE=1 SV=1	NA	NA	NA	NA
Q16281	Cyclic nucleotide-gated cation channel alpha-3 OS=Homo sapiens GN=CNGA3 PE=1 SV=2	NA	NA	NA	NA
P48736	Phosphatidylinositol 4,5-bisphosphate 3-kinase catalytic subunit gamma isoform OS=Homo sapiens GN=PIK3CG PE=1 SV=3	NA	NA	NA	NA
P01880	Ig delta chain C region OS=Homo sapiens GN=IGHD PE=1 SV=2	1.44631	0.519557	2.58442	0.243122
S6B291	IgG H chain OS=Homo sapiens PE=1 SV=1	NA	NA	NA	NA
F5BAE1	NADH-ubiquinone oxidoreductase chain 2 OS=Homo sapiens GN=ND2 PE=3 SV=1	NA	NA	NA	NA
A0A140TA29	Complement C4-B OS=Homo sapiens GN=C4B PE=1 SV=1	NA	NA	NA	NA
C9JJ19	28S ribosomal protein S34, mitochondrial OS=Homo sapiens GN=MRPS34 PE=1 SV=2	NA	NA	NA	NA
A0A087X0P6	Protein IGKV2D-29 OS=Homo sapiens GN=IGKV2D-29 PE=1 SV=1	2.07558	NA	2.55043	NA
G1FM90	Anti-Influenza A hemagglutinin heavy chain variable region (Fragment) OS=Homo sapiens PE=2 SV=1	1.32814	NA	1.21331	NA
P62805	Histone H4 OS=Homo sapiens GN=HIST1H4A PE=1 SV=2	NA	NA	NA	NA
B2R6W1	cDNA, FLJ93143, highly similar to Homo sapiens complement component 7 (C7), mRNA OS=Homo sapiens PE=2 SV=1	1.50621	0.393287	1.28564	0.564785
P06858	Lipoprotein lipase OS=Homo sapiens GN=LPL PE=1 SV=1	1.1841	NA	0.886182	NA
F4MHP5	Ubiquitously transcribed tetratricopeptide repeat protein Y-linked transcript variant 141 OS=Homo sapiens GN=UTY PE=2 SV=1	NA	NA	NA	NA
Q584P1	Putative uncharacterized protein PCYOX1 (Fragment) OS=Homo sapiens GN=PCYOX1 PE=4 SV=1	0.872416	0.224216	0.788032	0.0667143
P16070	CD44 antigen OS=Homo sapiens GN=CD44 PE=1 SV=3	0.958065	0.818177	1.10272	0.682114
Q15485	Ficolin-2 OS=Homo sapiens GN=FCN2 PE=1 SV=2	1.75689	0.0897564	0.593574	0.145356
P02775	Platelet basic protein OS=Homo sapiens GN=PPBP PE=1 SV=3	1.44158	0.419596	1.0005	0.99883
Q9UL72	Myosin-reactive immunoglobulin heavy chain variable region (Fragment) OS=Homo sapiens PE=2 SV=1	1.88068	NA	3.32849	NA
A0A087WZW8	Ig kappa chain C region OS=Homo sapiens GN=IGKC PE=1 SV=2	NA	NA	NA	NA
Q9NYC9	Dynein heavy chain 9, axonemal OS=Homo sapiens GN=DNAH9 PE=1 SV=3	NA	NA	NA	NA
P02794	Ferritin heavy chain OS=Homo sapiens GN=FTH1 PE=1 SV=2	NA	NA	NA	NA
P09871	Complement C1s subcomponent OS=Homo sapiens GN=C1S PE=1 SV=1	0.880689	0.148118	0.98447	0.870946
Q16610	Extracellular matrix protein 1 OS=Homo sapiens GN=ECM1 PE=1 SV=2	1.08835	0.793884	0.897997	0.713099
P48740	Mannan-binding lectin serine protease 1 OS=Homo sapiens GN=MASP1 PE=1 SV=3	1.18164	0.333661	1.14925	NA
S6AWD3	IgG L chain OS=Homo sapiens PE=2 SV=1	1.89086	NA	1.2735	NA
Q8IZC4	Rhotekin-2 OS=Homo sapiens GN=RTKN2 PE=2 SV=1	NA	NA	NA	NA
A0A0B4J2B5	Protein IGHV3OR16-9 (Fragment) OS=Homo sapiens GN=IGHV3OR16-9 PE=1 SV=1	1.08902	0.858775	1.59881	0.414396
Q7Z2E8	Rearranged Vl3l gene segment (Fragment) OS=Homo sapiens GN=VL3L PE=4 SV=1	NA	NA	NA	NA
A0A0A0MT74	Protein IGKV1-16 (Fragment) OS=Homo sapiens GN=IGKV1-16 PE=1 SV=1	1.84654	0.211587	1.74271	0.251477
D6RC60	Nucleolar protein 16 OS=Homo sapiens GN=NOP16 PE=1 SV=1	NA	NA	NA	NA
P01743	Ig heavy chain V-I region HG3 OS=Homo sapiens PE=3 SV=1	1.85003	0.145034	1.83361	0.146518
Q99880	Histone H2B type 1-L OS=Homo sapiens GN=HIST1H2BL PE=1 SV=3	2.69063	0.16494	1.00528	0.98608
P13647	Keratin, type II cytoskeletal 5 OS=Homo sapiens GN=KRT5 PE=1 SV=3	12.2542	NA	9.63267	NA
P01604	Ig kappa chain V-I region Kue OS=Homo sapiens PE=1 SV=1	1.41827	0.428792	1.67861	0.2808
Q0ZCH6	Immunglobulin heavy chain variable region (Fragment) OS=Homo sapiens PE=4 SV=1	2.98664	0.0939902	2.16566	0.168763
H0Y9V9	60S ribosomal protein L9 (Fragment) OS=Homo sapiens GN=RPL9 PE=1 SV=1	NA	NA	NA	NA
B7Z557	cDNA FLJ53076, highly similar to Hepatocyte growth factor-like protein OS=Homo sapiens PE=2 SV=1	NA	NA	NA	NA
Q0ZCJ1	Immunglobulin heavy chain variable region (Fragment) OS=Homo sapiens PE=4 SV=1	1.1638	0.645098	1.90818	0.167805
Q86WI1	Fibrocystin-L OS=Homo sapiens GN=PKHD1L1 PE=2 SV=2	NA	NA	NA	NA
V9H0D6	Complement C4A3 (Fragment) OS=Homo sapiens GN=C4A PE=4 SV=1	1.91373	NA	NA	NA
Q9H804	cDNA FLJ14022 fis, clone HEMBA1003538, weakly similar to COMPLEMENT C1R COMPONENT (EC 3.4.21.41) OS=Homo sapiens PE=2 SV=1	NA	NA	NA	NA
B7Z544	cDNA FLJ51742, highly similar to Inter-alpha-trypsin inhibitor heavy chain H4 OS=Homo sapiens PE=2 SV=1	NA	NA	NA	NA
P15169	Carboxypeptidase N catalytic chain OS=Homo sapiens GN=CPN1 PE=1 SV=1	1.01551	0.880339	1.01062	0.905849
S6BGD6	IgG L chain OS=Homo sapiens PE=1 SV=1	NA	NA	NA	NA
A2J423	Anti-Mpl scFv (Fragment) OS=Homo sapiens PE=2 SV=1	0.800114	0.706906	0.709444	0.608122
P11597	Cholesteryl ester transfer protein OS=Homo sapiens GN=CETP PE=1 SV=2	0.744283	0.182043	0.715653	0.133427
F8W7A7	Coiled-coil domain-containing protein 178 OS=Homo sapiens GN=CCDC178 PE=4 SV=1	NA	NA	NA	NA
P01708	Ig lambda chain V-II region BUR OS=Homo sapiens PE=1 SV=1	1.32687	NA	0.84415	NA
P19827	Inter-alpha-trypsin inhibitor heavy chain H1 OS=Homo sapiens GN=ITIH1 PE=1 SV=3	0.748192	NA	0.746168	NA
P32119	Peroxiredoxin-2 OS=Homo sapiens GN=PRDX2 PE=1 SV=5	1.92076	0.177493	1.01592	0.965971
O75323	Protein NipSnap homolog 2 OS=Homo sapiens GN=GBAS PE=1 SV=1	NA	NA	NA	NA
Q7Z2Y8	Interferon-induced very large GTPase 1 OS=Homo sapiens GN=GVINP1 PE=2 SV=2	NA	NA	NA	NA
H0Y9H2	Alpha-adducin (Fragment) OS=Homo sapiens GN=ADD1 PE=1 SV=1	0.689507	NA	0.313382	NA
P01859	Ig gamma-2 chain C region OS=Homo sapiens GN=IGHG2 PE=1 SV=2	1.09675	NA	0.875974	NA
P02753	Retinol-binding protein 4 OS=Homo sapiens GN=RBP4 PE=1 SV=3	1.24731	0.521663	1.38882	0.368441
Q15063	Periostin OS=Homo sapiens GN=POSTN PE=1 SV=2	0.866667	NA	0.578557	NA
Q5NV82	V4-2 protein (Fragment) OS=Homo sapiens GN=V4-2 PE=4 SV=1	1.09559	NA	1.04075	NA
A7L3A3	Angiotensinogen (Fragment) OS=Homo sapiens GN=AGT PE=3 SV=1	1.47398	NA	2.54367	NA
P26038	Moesin OS=Homo sapiens GN=MSN PE=1 SV=3	NA	NA	0.828488	NA
Q59FZ8	Nebulette non-muscle isoform variant (Fragment) OS=Homo sapiens PE=2 SV=1	NA	NA	NA	NA
P12236	ADP/ATP translocase 3 OS=Homo sapiens GN=SLC25A6 PE=1 SV=4	NA	NA	NA	NA
F1AZF2	Cytochrome c oxidase subunit 2 OS=Homo sapiens GN=COX2 PE=3 SV=1	NA	NA	NA	NA
P01024	Complement C3 OS=Homo sapiens GN=C3 PE=1 SV=2	0.890839	0.342721	0.812814	0.0734284
P02649	Apolipoprotein E OS=Homo sapiens GN=APOE PE=1 SV=1	1.01977	0.896515	0.869806	0.371934
B4DR57	cDNA FLJ60818, highly similar to Complement C3 OS=Homo sapiens PE=2 SV=1	NA	NA	NA	NA
Q15166	Serum paraoxonase/lactonase 3 OS=Homo sapiens GN=PON3 PE=1 SV=3	NA	NA	NA	NA
Q9UL88	Myosin-reactive immunoglobulin heavy chain variable region (Fragment) OS=Homo sapiens PE=2 SV=1	1.51428	0.220897	1.62627	0.174245
P04206	Ig kappa chain V-III region GOL OS=Homo sapiens PE=1 SV=1	NA	NA	NA	NA
Q9BYP7	Serine/threonine-protein kinase WNK3 OS=Homo sapiens GN=WNK3 PE=1 SV=3	NA	NA	NA	NA
Q9UK55	Protein Z-dependent protease inhibitor OS=Homo sapiens GN=SERPINA10 PE=1 SV=1	0.958631	0.713778	1.07154	0.543
Q8TE63	Immunglobulin light chain variable region (Fragment) OS=Homo sapiens PE=2 SV=1	1.17097	0.63147	1.12624	0.659768
G3V434	Ubiquinone biosynthesis monooxygenase COQ6, mitochondrial OS=Homo sapiens GN=COQ6 PE=1 SV=1	NA	NA	NA	NA
Q96FF7	Uncharacterized protein LOC113230 OS=Homo sapiens PE=2 SV=4	NA	NA	NA	NA
P09172	Dopamine beta-hydroxylase OS=Homo sapiens GN=DBH PE=1 SV=3	1.10919	0.661897	1.94985	0.0522352
P08709	Coagulation factor VII OS=Homo sapiens GN=F7 PE=1 SV=1	0.848393	NA	1.00774	NA
P84243	Histone H3.3 OS=Homo sapiens GN=H3F3A PE=1 SV=2	NA	NA	NA	NA
P13645	Keratin, type I cytoskeletal 10 OS=Homo sapiens GN=KRT10 PE=1 SV=6	4.95987	0.512518	1.70424	0.732275
P55056	Apolipoprotein C-IV OS=Homo sapiens GN=APOC4 PE=1 SV=1	1.03214	0.896407	0.804866	0.426837
Q7Z351	Putative uncharacterized protein DKFZp686N02209 OS=Homo sapiens GN=DKFZp686N02209 PE=2 SV=1	1.11807	0.721921	1.86846	NA
P11226	Mannose-binding protein C OS=Homo sapiens GN=MBL2 PE=1 SV=2	1.65434	NA	0.689665	0.251739
A0A125U0V2	GCT-A1 heavy chain variable region (Fragment) OS=Homo sapiens PE=2 SV=1	2.63799	NA	1.72546	NA
A0A0U1RRF4	Protein IGKV1-8 OS=Homo sapiens GN=IGKV1-8 PE=4 SV=1	NA	NA	NA	NA
B4DDH1	cDNA FLJ53503, highly similar to Plasma serine protease inhibitor OS=Homo sapiens PE=2 SV=1	NA	NA	NA	NA
A0A125U0U4	MS-A4 heavy chain variable region (Fragment) OS=Homo sapiens PE=2 SV=1	0.742477	NA	0.775695	NA
Q86XX4	Extracellular matrix protein FRAS1 OS=Homo sapiens GN=FRAS1 PE=1 SV=2	NA	NA	NA	NA
Q5NV64	V2-11 protein (Fragment) OS=Homo sapiens GN=V2-11 PE=4 SV=1	2.20772	0.588216	3.4353	0.483293
Q6PJG0	Uncharacterized protein OS=Homo sapiens PE=1 SV=1	1.78636	0.512853	3.67907	0.300443
A0A087X2C0	Ig mu chain C region OS=Homo sapiens GN=IGHM PE=1 SV=1	1.35941	NA	1.67804	NA
Q08380	Galectin-3-binding protein OS=Homo sapiens GN=LGALS3BP PE=1 SV=1	1.27655	0.371695	1.43493	0.210044
P20851	C4b-binding protein beta chain OS=Homo sapiens GN=C4BPB PE=1 SV=1	1.08064	0.533994	1.03939	0.784883
P04275	von Willebrand factor OS=Homo sapiens GN=VWF PE=1 SV=4	1.63932	0.175818	1.37171	0.309895
P17936	Insulin-like growth factor-binding protein 3 OS=Homo sapiens GN=IGFBP3 PE=1 SV=2	0.552356	0.00126987	0.665884	0.0207836
P09486	SPARC OS=Homo sapiens GN=SPARC PE=1 SV=1	1.52168	NA	1.30322	NA
P07355	Annexin A2 OS=Homo sapiens GN=ANXA2 PE=1 SV=2	2.79319	NA	1.24859	NA
E9PQD6	Serum amyloid A protein OS=Homo sapiens GN=SAA1 PE=1 SV=1	18.4707	NA	6.26291	NA
A2N0T1	VH6DJ protein (Fragment) OS=Homo sapiens GN=VH6DJ PE=2 SV=1	NA	NA	NA	NA
O15533	Tapasin OS=Homo sapiens GN=TAPBP PE=1 SV=1	NA	NA	NA	NA
P02647	Apolipoprotein A-I OS=Homo sapiens GN=APOA1 PE=1 SV=1	0.847605	0.115164	0.961375	0.722121
Q03591	Complement factor H-related protein 1 OS=Homo sapiens GN=CFHR1 PE=1 SV=2	0.794657	0.461767	0.905175	0.739227
A0A0X9V9D6	IBM-B2 light chain variable region (Fragment) OS=Homo sapiens PE=2 SV=1	0.614067	0.223892	0.724481	0.331841
B7ZAI1	cDNA, FLJ79195, highly similar to Homo sapiens 2-aminoadipic 6-semialdehyde dehydrogenase (AASDH), mRNA OS=Homo sapiens PE=2 SV=1	NA	NA	NA	NA
P33151	Cadherin-5 OS=Homo sapiens GN=CDH5 PE=1 SV=5	1.02884	0.820899	0.991494	0.947894
O75484	Diacylglycerol kinase alpha OS=Homo sapiens GN=DAGK1 PE=2 SV=1	NA	NA	NA	NA
P05109	Protein S100-A8 OS=Homo sapiens GN=S100A8 PE=1 SV=1	5.19614	0.467344	3.48005	0.52066
Q9Y5B9	FACT complex subunit SPT16 OS=Homo sapiens GN=SUPT16H PE=1 SV=1	NA	NA	NA	NA
X6RCR8	AT-rich interactive domain-containing protein 4B (Fragment) OS=Homo sapiens GN=ARID4B PE=1 SV=1	NA	NA	NA	NA
H6VRF8	Keratin 1 OS=Homo sapiens GN=KRT1 PE=3 SV=1	9.80604	NA	6.28812	NA
P01773	Ig heavy chain V-III region BUR OS=Homo sapiens PE=1 SV=1	1.32242	0.40222	1.22923	0.538903
P01768	Ig heavy chain V-III region CAM OS=Homo sapiens PE=1 SV=1	1.20081	0.500962	1.19614	0.537651
B4DUV1	Fibulin-1 OS=Homo sapiens PE=2 SV=1	1.08428	NA	0.614704	NA
A0A0F7SYT0	IGHV2-26 protein (Fragment) OS=Homo sapiens GN=IGHV2-26 PE=4 SV=1	4.46245	NA	6.45461	NA
P07358	Complement component C8 beta chain OS=Homo sapiens GN=C8B PE=1 SV=3	0.874788	0.162598	0.761144	0.00944669
H0YJN5	Receptor-interacting serine/threonine-protein kinase 3 (Fragment) OS=Homo sapiens GN=RIPK3 PE=4 SV=1	NA	NA	NA	NA
P14618	Pyruvate kinase PKM OS=Homo sapiens GN=PKM PE=1 SV=4	1.16074	NA	1.25704	NA
Q15149	Plectin OS=Homo sapiens GN=PLEC PE=1 SV=3	NA	NA	NA	NA
Q9UL70	Myosin-reactive immunoglobulin light chain variable region (Fragment) OS=Homo sapiens PE=2 SV=1	0.753032	0.197762	0.956695	0.899483
P04179	Superoxide dismutase [Mn], mitochondrial OS=Homo sapiens GN=SOD2 PE=1 SV=2	0.557305	NA	NA	NA
A0A125QYY4	GCT-A7 heavy chain variable region (Fragment) OS=Homo sapiens PE=2 SV=1	1.4701	NA	0.875804	NA
P01876	Ig alpha-1 chain C region OS=Homo sapiens GN=IGHA1 PE=1 SV=2	1.00157	NA	1.17156	NA
P08697	Alpha-2-antiplasmin OS=Homo sapiens GN=SERPINF2 PE=1 SV=3	0.912795	0.288929	0.954577	0.567071
Q86U78	Angiotensinogen (Serine (Or cysteine) proteinase inhibitor, clade A (Alpha-1 antiproteinase, antitrypsin), member 8) OS=Homo sapiens PE=2 SV=1	1.2606	0.142963	1.2773	0.137189
A2MYE2	A30 protein (Fragment) OS=Homo sapiens GN=A30 PE=4 SV=1	1.47179	0.62718	1.07472	0.919807
P05155	Plasma protease C1 inhibitor OS=Homo sapiens GN=SERPING1 PE=1 SV=2	1.18445	0.0525163	1.11722	0.269992
P06681	Complement C2 OS=Homo sapiens GN=C2 PE=1 SV=2	1.07887	0.417769	1.03159	0.691295
Q9BQ69	O-acetyl-ADP-ribose deacetylase MACROD1 OS=Homo sapiens GN=MACROD1 PE=1 SV=2	NA	NA	NA	NA
A2J1M8	Rheumatoid factor RF-IP12 (Fragment) OS=Homo sapiens PE=2 SV=1	1.12917	0.736454	1.34347	0.43165
Q5T4C6	Outer dense fiber protein 2 (Fragment) OS=Homo sapiens GN=ODF2 PE=1 SV=1	1.13163	NA	1.28717	NA
Q6GMV8	Uncharacterized protein OS=Homo sapiens PE=2 SV=1	1.7548	NA	0.327166	NA
P02774	Vitamin D-binding protein OS=Homo sapiens GN=GC PE=1 SV=1	0.976947	0.933005	1.29965	0.344998
Q13616	Cullin-1 OS=Homo sapiens GN=CUL1 PE=1 SV=2	NA	NA	NA	NA
G3GAU4	Anti-H1N1 influenza HA kappa chain variable region (Fragment) OS=Homo sapiens PE=2 SV=1	NA	NA	NA	NA
Q0ZCH9	Immunglobulin heavy chain variable region (Fragment) OS=Homo sapiens PE=4 SV=1	NA	NA	NA	NA
P0DJI9	Serum amyloid A-2 protein OS=Homo sapiens GN=SAA2 PE=1 SV=1	1.7592	0.551724	1.57398	NA
P13473	Lysosome-associated membrane glycoprotein 2 OS=Homo sapiens GN=LAMP2 PE=1 SV=2	1.02724	NA	0.964393	NA
P06887	Ig lambda chain V-I region MEM OS=Homo sapiens PE=1 SV=1	NA	NA	NA	NA
B7ZBK1	Coagulation factor X OS=Homo sapiens GN=F10 PE=1 SV=1	NA	NA	NA	NA
P0C0L4	Complement C4-A OS=Homo sapiens GN=C4A PE=1 SV=2	NA	NA	NA	NA
Q5NV91	V2-19 protein (Fragment) OS=Homo sapiens GN=V2-19 PE=4 SV=1	2.04955	0.510996	1.41671	0.712229
A0N5G5	Rheumatoid factor D5 light chain (Fragment) OS=Homo sapiens GN=V<kappa>3 PE=2 SV=1	NA	NA	NA	NA
P04114	Apolipoprotein B-100 OS=Homo sapiens GN=APOB PE=1 SV=2	1.20186	0.364444	0.814381	0.276375
Q8NF20	FLJ00382 protein (Fragment) OS=Homo sapiens GN=FLJ00382 PE=2 SV=1	1.39039	0.349763	2.12376	0.11307
P01815	Ig heavy chain V-II region COR OS=Homo sapiens PE=1 SV=1	NA	NA	NA	NA
P01769	Ig heavy chain V-III region GA OS=Homo sapiens PE=1 SV=1	1.98846	NA	1.76193	NA
C9JB55	Serotransferrin (Fragment) OS=Homo sapiens GN=TF PE=1 SV=7	NA	NA	NA	NA
P04430	Ig kappa chain V-I region BAN OS=Homo sapiens PE=1 SV=1	1.43199	0.259095	1.15309	0.635544
A0A0C4DH35	Protein IGHV3-35 (Fragment) OS=Homo sapiens GN=IGHV3-35 PE=1 SV=1	1.39342	0.524969	1.65886	0.38055
O75679	Ret finger protein-like 3 OS=Homo sapiens GN=RFPL3 PE=1 SV=2	NA	NA	NA	NA
Q13201	Multimerin-1 OS=Homo sapiens GN=MMRN1 PE=1 SV=3	1.69357	NA	0.688543	NA
Q7Z665	Putative uncharacterized protein DKFZp779E2271 (Fragment) OS=Homo sapiens GN=DKFZp779E2271 PE=2 SV=1	NA	NA	NA	NA
Q86SX2	Full-length cDNA clone CS0DL004YM19 of B cells (Ramos cell line) of Homo sapiens (human) (Fragment) OS=Homo sapiens PE=2 SV=1	3.06419	0.130367	4.11903	0.0988909
P49908	Selenoprotein P OS=Homo sapiens GN=SEPP1 PE=1 SV=3	0.634351	NA	0.527226	NA
Q6DHW4	Uncharacterized protein OS=Homo sapiens PE=2 SV=1	NA	NA	NA	NA
A2NH55	Immunogobulin kappa, VJ region (Fragment) OS=Homo sapiens PE=4 SV=1	4.74623	NA	2.83916	NA
Q9NZP8	Complement C1r subcomponent-like protein OS=Homo sapiens GN=C1RL PE=1 SV=2	1.16575	0.110068	1.1126	0.237945
A0A087WYC5	Ig gamma-1 chain C region OS=Homo sapiens GN=IGHG1 PE=1 SV=1	3.31197	0.0383112	3.80551	0.0334792
H3BTX0	Uncharacterized protein (Fragment) OS=Homo sapiens PE=4 SV=2	NA	NA	NA	NA
S6AWF4	IgG L chain OS=Homo sapiens PE=2 SV=1	NA	NA	NA	NA
Q16720	Plasma membrane calcium-transporting ATPase 3 OS=Homo sapiens GN=ATP2B3 PE=1 SV=3	NA	NA	NA	NA
B7ZMJ3	ADAMTSL4 protein OS=Homo sapiens GN=ADAMTSL4 PE=2 SV=1	NA	NA	NA	NA
P48509	CD151 antigen OS=Homo sapiens GN=CD151 PE=1 SV=3	NA	NA	NA	NA
A0A109PW74	IBM-B3 light chain variable region (Fragment) OS=Homo sapiens PE=2 SV=1	0.961106	NA	0.872024	NA
P18428	Lipopolysaccharide-binding protein OS=Homo sapiens GN=LBP PE=1 SV=3	1.09663	0.675145	0.909526	0.678515
Q8TEA7	TBC domain-containing protein kinase-like protein OS=Homo sapiens GN=TBCK PE=1 SV=4	NA	NA	NA	NA
A2MYD4	V2-7 protein (Fragment) OS=Homo sapiens GN=V2-7 PE=4 SV=1	1.47408	0.132484	1.7456	0.0389317
Q9NS66	Probable G-protein coupled receptor 173 OS=Homo sapiens GN=GPR173 PE=2 SV=1	NA	NA	NA	NA
Q5T447	E3 ubiquitin-protein ligase HECTD3 OS=Homo sapiens GN=HECTD3 PE=1 SV=1	NA	NA	NA	NA
Q0ZCG4	Immunglobulin heavy chain variable region (Fragment) OS=Homo sapiens PE=4 SV=1	NA	NA	NA	NA
Q9P235	KIAA1493 protein (Fragment) OS=Homo sapiens GN=KIAA1493 PE=2 SV=1	NA	NA	NA	NA
P0DJI8	Serum amyloid A-1 protein OS=Homo sapiens GN=SAA1 PE=1 SV=1	4.12371	NA	1.60643	NA
P35626	Beta-adrenergic receptor kinase 2 OS=Homo sapiens GN=ADRBK2 PE=1 SV=2	NA	NA	NA	NA
Q5NV70	V1-11 protein (Fragment) OS=Homo sapiens GN=V1-11 PE=4 SV=1	2.97874	0.325741	2.14114	0.428815
Q9BWP8	Collectin-11 OS=Homo sapiens GN=COLEC11 PE=1 SV=1	1.24259	NA	2.0275	NA
Q12766	HMG domain-containing protein 3 OS=Homo sapiens GN=HMGXB3 PE=2 SV=2	NA	NA	NA	NA
Q6UX71	Plexin domain-containing protein 2 OS=Homo sapiens GN=PLXDC2 PE=1 SV=1	0.858706	NA	0.826628	NA
Q6ZW64	cDNA FLJ41552 fis, clone COLON2004478, highly similar to Protein Tro alpha1 H,myeloma OS=Homo sapiens PE=2 SV=1	1.27466	0.58002	1.38163	0.48528
Q96K68	cDNA FLJ14473 fis, clone MAMMA1001080, highly similar to Homo sapiens SNC73 protein (SNC73) mRNA OS=Homo sapiens PE=2 SV=1	0.851703	NA	0.853414	NA
P01009	Alpha-1-antitrypsin OS=Homo sapiens GN=SERPINA1 PE=1 SV=3	1.07224	0.0938473	0.957588	0.616885
A2NWW3	VH-3 family (VH26)D/J protein (Fragment) OS=Homo sapiens GN=VH-3 family (VH26)D/J PE=4 SV=1	1.79099	NA	3.59231	NA
Q86W24	NACHT, LRR and PYD domains-containing protein 14 OS=Homo sapiens GN=NLRP14 PE=1 SV=1	NA	NA	NA	NA
P47736	Rap1 GTPase-activating protein 1 OS=Homo sapiens GN=RAP1GAP PE=1 SV=2	NA	NA	NA	NA
P01714	Ig lambda chain V-III region SH OS=Homo sapiens PE=1 SV=1	1.45488	0.45695	2.59029	0.166298
Q96SB0	Anti-streptococcal/anti-myosin immunoglobulin lambda light chain variable region (Fragment) OS=Homo sapiens PE=2 SV=1	NA	NA	NA	NA
O75322	Hsp89-alpha-delta-N OS=Homo sapiens PE=2 SV=1	1.82751	NA	1.29167	NA
Q14542	Equilibrative nucleoside transporter 2 OS=Homo sapiens GN=SLC29A2 PE=1 SV=3	NA	NA	NA	NA
Q96GE4	Centrosomal protein of 95 kDa OS=Homo sapiens GN=CEP95 PE=1 SV=1	NA	NA	NA	NA
Q07889	Son of sevenless homolog 1 OS=Homo sapiens GN=SOS1 PE=1 SV=1	NA	NA	NA	NA
Q9NW08	DNA-directed RNA polymerase III subunit RPC2 OS=Homo sapiens GN=POLR3B PE=1 SV=2	NA	NA	NA	NA
O15318	DNA-directed RNA polymerase III subunit RPC7 OS=Homo sapiens GN=POLR3G PE=1 SV=2	NA	NA	NA	NA
P43652	Afamin OS=Homo sapiens GN=AFM PE=1 SV=1	0.803883	0.0541146	0.817056	0.10166
F8WE78	Guanine nucleotide-binding protein G(i) subunit alpha-2 OS=Homo sapiens GN=GNAI2 PE=1 SV=1	30.3522	NA	20.6132	NA
Q9UL91	Myosin-reactive immunoglobulin heavy chain variable region (Fragment) OS=Homo sapiens PE=2 SV=1	NA	NA	NA	NA
Q6PIQ7	IGL@ protein OS=Homo sapiens GN=IGL@ PE=1 SV=1	NA	NA	NA	NA
P14151	L-selectin OS=Homo sapiens GN=SELL PE=1 SV=2	1.60264	0.08015	0.772165	0.450488
P26992	Ciliary neurotrophic factor receptor subunit alpha OS=Homo sapiens GN=CNTFR PE=1 SV=2	1.20333	NA	2.20122	NA
O43866	CD5 antigen-like OS=Homo sapiens GN=CD5L PE=1 SV=1	0.732053	0.0941422	1.11027	0.631281
P13671	Complement component C6 OS=Homo sapiens GN=C6 PE=1 SV=3	1.06411	0.588476	1.01214	0.914602
Q14669	E3 ubiquitin-protein ligase TRIP12 OS=Homo sapiens GN=TRIP12 PE=1 SV=1	NA	NA	NA	NA
B4E2M9	cDNA FLJ54777, moderately similar to Mus musculus exonuclease domain containing 1 (Exod1), mRNA OS=Homo sapiens PE=2 SV=1	NA	NA	NA	NA
Q8N355	IGL@ protein OS=Homo sapiens GN=IGL@ PE=1 SV=1	NA	NA	NA	NA
G1FM93	Anti-Influenza A hemagglutinin heavy chain variable region (Fragment) OS=Homo sapiens PE=2 SV=1	1.1711	NA	1.09101	NA
Q6ZNX5	CDNA FLJ26936 fis, clone RCT06808 OS=Homo sapiens PE=2 SV=1	1.49871	0.542099	2.32271	0.31997
B7Z814	cDNA FLJ61667, highly similar to Homo sapiens regulator of G-protein signalling like 2 (RGSL2), mRNA OS=Homo sapiens PE=2 SV=1	NA	NA	NA	NA
P25788	Proteasome subunit alpha type-3 OS=Homo sapiens GN=PSMA3 PE=1 SV=2	1.06501	NA	1.31581	NA
Q71SV8	Crn-related protein kim1 OS=Homo sapiens PE=2 SV=1	NA	NA	NA	NA
P0C0L5	Complement C4-B OS=Homo sapiens GN=C4B PE=1 SV=2	NA	NA	NA	NA
B4DWQ3	Phosphoglycerate kinase OS=Homo sapiens PE=2 SV=1	NA	NA	NA	NA
P11279	Lysosome-associated membrane glycoprotein 1 OS=Homo sapiens GN=LAMP1 PE=1 SV=3	NA	NA	NA	NA
P80748	Ig lambda chain V-III region LOI OS=Homo sapiens PE=1 SV=1	1.26149	0.730772	1.43154	0.617482
P20742	Pregnancy zone protein OS=Homo sapiens GN=PZP PE=1 SV=4	1.66226	0.060982	0.830403	0.348174
Q9HAZ1	Dual specificity protein kinase CLK4 OS=Homo sapiens GN=CLK4 PE=1 SV=1	NA	NA	NA	NA
R4GN54	Protein COMMD3-BMI1 (Fragment) OS=Homo sapiens GN=COMMD3-BMI1 PE=4 SV=1	NA	NA	NA	NA
Q96B36	Proline-rich AKT1 substrate 1 OS=Homo sapiens GN=AKT1S1 PE=1 SV=1	NA	NA	NA	NA
A0A0K2BMD8	Mutant hemoglobin alpha 2 globin chain OS=Homo sapiens GN=HBA2 PE=3 SV=1	NA	NA	NA	NA
P01717	Ig lambda chain V-IV region Hil OS=Homo sapiens PE=1 SV=1	1.44565	NA	2.08405	NA
S6BAP0	IgG H chain OS=Homo sapiens PE=2 SV=1	NA	NA	NA	NA
Q96IY4	Carboxypeptidase B2 OS=Homo sapiens GN=CPB2 PE=1 SV=2	0.778208	0.0508516	0.748276	0.0370763
P01344	Insulin-like growth factor II OS=Homo sapiens GN=IGF2 PE=1 SV=1	0.844112	0.45965	0.971011	0.876453
P58335	Anthrax toxin receptor 2 OS=Homo sapiens GN=ANTXR2 PE=1 SV=5	1.10326	NA	0.729397	NA
E7EPG1	Multimerin-1 OS=Homo sapiens GN=MMRN1 PE=1 SV=1	NA	NA	NA	NA
Q6ZSZ6	Teashirt homolog 1 OS=Homo sapiens GN=TSHZ1 PE=1 SV=2	NA	NA	NA	NA
Q9BQI7	PH and SEC7 domain-containing protein 2 OS=Homo sapiens GN=PSD2 PE=2 SV=3	NA	NA	NA	NA
P22105	Tenascin-X OS=Homo sapiens GN=TNXB PE=1 SV=4	1.30082	NA	1.19091	NA
A2J1M3	Rheumatoid factor RF-ET5 (Fragment) OS=Homo sapiens PE=2 SV=1	3.37091	NA	4.41104	NA
Q02383	Semenogelin-2 OS=Homo sapiens GN=SEMG2 PE=1 SV=1	0.803121	NA	2.00299	NA
P98169	Zinc finger X-linked protein ZXDB OS=Homo sapiens GN=ZXDB PE=2 SV=2	NA	NA	NA	NA
Q6PCB5	Round spermatid basic protein 1-like protein OS=Homo sapiens GN=RSBN1L PE=1 SV=2	NA	NA	NA	NA
Q6PIK1	IGL@ protein OS=Homo sapiens GN=IGL@ PE=1 SV=1	1.72082	NA	1.9779	NA
Q6GMX0	Uncharacterized protein OS=Homo sapiens PE=1 SV=1	NA	NA	NA	NA
P23142	Fibulin-1 OS=Homo sapiens GN=FBLN1 PE=1 SV=4	0.972296	0.928912	1.07418	0.842543
Q99996	A-kinase anchor protein 9 OS=Homo sapiens GN=AKAP9 PE=1 SV=3	NA	NA	NA	NA
A0A0F7TB04	IGHV5-51 protein (Fragment) OS=Homo sapiens GN=IGHV5-51 PE=4 SV=1	NA	NA	NA	NA
A2J1N4	Rheumatoid factor RF-IP24 (Fragment) OS=Homo sapiens PE=2 SV=1	1.90806	0.350615	1.24303	0.675448
Q96HJ3	Coiled-coil domain-containing protein 34 OS=Homo sapiens GN=CCDC34 PE=1 SV=2	NA	NA	NA	NA
P19320	Vascular cell adhesion protein 1 OS=Homo sapiens GN=VCAM1 PE=1 SV=1	1.50852	0.181533	1.35996	0.283719
Q4KWH8	1-phosphatidylinositol 4,5-bisphosphate phosphodiesterase eta-1 OS=Homo sapiens GN=PLCH1 PE=1 SV=1	NA	NA	NA	NA
A0A068LKS1	Ig heavy chain variable region (Fragment) OS=Homo sapiens PE=2 SV=1	NA	NA	NA	NA
Q86U17	Serpin A11 OS=Homo sapiens GN=SERPINA11 PE=2 SV=2	0.760393	0.180591	0.830547	0.406501
Q96QS0	Putative matrix cell adhesion molecule-3 OS=Homo sapiens PE=2 SV=1	1.23068	0.492332	0.952227	0.910993
O75882	Attractin OS=Homo sapiens GN=ATRN PE=1 SV=2	0.92745	0.203999	0.841358	0.0116288
P12109	Collagen alpha-1(VI) chain OS=Homo sapiens GN=COL6A1 PE=1 SV=3	1.20126	0.382011	1.18894	0.455172
P05154	Plasma serine protease inhibitor OS=Homo sapiens GN=SERPINA5 PE=1 SV=3	0.497555	0.101505	0.922911	0.777542
Q6N092	Putative uncharacterized protein DKFZp686K18196 (Fragment) OS=Homo sapiens GN=DKFZp686K18196 PE=2 SV=1	1.66197	0.621267	1.32443	NA
P02741	C-reactive protein OS=Homo sapiens GN=CRP PE=1 SV=1	3.78181	0.0383657	1.98072	0.156046
B4E1B2	cDNA FLJ53691, highly similar to Serotransferrin OS=Homo sapiens PE=2 SV=1	0.840744	0.754205	0.89882	0.8124
P08493	Matrix Gla protein OS=Homo sapiens GN=MGP PE=1 SV=2	NA	NA	NA	NA
A0A0G2JRQ6	Uncharacterized protein (Fragment) OS=Homo sapiens PE=1 SV=3	1.06877	NA	1.68271	NA
P59666	Neutrophil defensin 3 OS=Homo sapiens GN=DEFA3 PE=1 SV=1	NA	NA	NA	NA
Q96PD2	Discoidin, CUB and LCCL domain-containing protein 2 OS=Homo sapiens GN=DCBLD2 PE=1 SV=1	NA	NA	NA	NA
A2J1N0	Rheumatoid factor RF-IP14 (Fragment) OS=Homo sapiens PE=2 SV=1	NA	NA	NA	NA
P62937	Peptidyl-prolyl cis-trans isomerase A OS=Homo sapiens GN=PPIA PE=1 SV=2	NA	NA	NA	NA
Q15370	Transcription elongation factor B polypeptide 2 OS=Homo sapiens GN=TCEB2 PE=1 SV=1	NA	NA	NA	NA
P01597	Ig kappa chain V-I region DEE OS=Homo sapiens PE=1 SV=1	1.61131	0.131246	1.43107	0.232723
Q9NSD6	This CDS feature is included to show the translation of the corresponding V_region. Presently translation qualifiers on V_region features are illegal (Fragment) OS=Homo sapiens PE=2 SV=1	3.12879	NA	2.41992	NA
P02749	Beta-2-glycoprotein 1 OS=Homo sapiens GN=APOH PE=1 SV=3	0.882167	0.150916	0.771379	0.0184317
Q14667	Protein KIAA0100 OS=Homo sapiens GN=KIAA0100 PE=1 SV=3	NA	NA	NA	NA
P49913	Cathelicidin antimicrobial peptide OS=Homo sapiens GN=CAMP PE=1 SV=1	1.49497	NA	0.762169	NA
P04434	Ig kappa chain V-III region VH (Fragment) OS=Homo sapiens PE=4 SV=1	1.0629	NA	0.675882	NA
A0A0G2JPR0	Complement C4-A OS=Homo sapiens GN=C4A PE=1 SV=1	NA	NA	NA	NA
P01615	Ig kappa chain V-II region FR OS=Homo sapiens PE=1 SV=1	NA	NA	NA	NA
A0A125U0U8	MS-C3 light chain variable region (Fragment) OS=Homo sapiens PE=2 SV=1	1.33438	0.366337	1.84029	0.116963
Q9H2C2	Protein ARV1 OS=Homo sapiens GN=ARV1 PE=2 SV=1	NA	NA	NA	NA
Q9NSY8	Putative uncharacterized protein DKFZp586F0824 (Fragment) OS=Homo sapiens GN=DKFZp586F0824 PE=2 SV=1	1.26797	NA	1.49937	NA
Q9UL78	Myosin-reactive immunoglobulin light chain variable region (Fragment) OS=Homo sapiens PE=2 SV=1	NA	NA	NA	NA
A0A0F7TC28	IGHV4-4 protein (Fragment) OS=Homo sapiens GN=IGHV4-4 PE=4 SV=1	NA	NA	NA	NA
O00155	Probable G-protein coupled receptor 25 OS=Homo sapiens GN=GPR25 PE=1 SV=2	NA	NA	NA	NA
P58304	Visual system homeobox 2 OS=Homo sapiens GN=VSX2 PE=1 SV=1	NA	NA	NA	NA
Q14520	Hyaluronan-binding protein 2 OS=Homo sapiens GN=HABP2 PE=1 SV=1	1.19057	0.138062	1.23117	0.0712988
B4DPP8	cDNA FLJ53075, highly similar to Kininogen-1 OS=Homo sapiens PE=2 SV=1	0.916925	0.206925	1.06552	0.414082
Q5BJF6	Outer dense fiber protein 2 OS=Homo sapiens GN=ODF2 PE=1 SV=1	0.883229	NA	0.961816	NA
P13797	Plastin-3 OS=Homo sapiens GN=PLS3 PE=1 SV=4	NA	NA	NA	NA
Q9UL89	Myosin-reactive immunoglobulin heavy chain variable region (Fragment) OS=Homo sapiens PE=2 SV=1	10.3494	0.10984	6.72205	0.128768
A2N7P4	Immunoglobulin mu-chain D-J4-region (Fragment) OS=Homo sapiens GN=IGHM PE=4 SV=1	1.75384	NA	1.72934	NA
P06888	Ig lambda chain V-I region EPS OS=Homo sapiens PE=1 SV=1	0.518182	NA	0.0646567	NA
A0A0X9UWL5	GCT-A5 light chain variable region (Fragment) OS=Homo sapiens PE=2 SV=1	1.21321	0.66465	1.82649	0.273618
P01763	Ig heavy chain V-III region WEA OS=Homo sapiens PE=1 SV=1	1.09791	0.741428	1.02121	0.95026
P15812	T-cell surface glycoprotein CD1e, membrane-associated OS=Homo sapiens GN=CD1E PE=1 SV=2	NA	NA	NA	NA
P04438	Ig heavy chain V-II region SESS OS=Homo sapiens PE=2 SV=1	NA	NA	NA	NA
B8ZZB6	Protein IWS1 homolog (Fragment) OS=Homo sapiens GN=IWS1 PE=1 SV=1	2.47578	0.48936	3.07241	0.436849
A0A068LL62	Ig heavy chain variable region (Fragment) OS=Homo sapiens PE=2 SV=1	NA	NA	NA	NA
B2MUX6	Insulin-like growth factor 2 OS=Homo sapiens GN=IGF2 PE=3 SV=1	1.16059	NA	1.04192	NA
Q6YL45	Putative uncharacterized protein OS=Homo sapiens PE=2 SV=1	NA	NA	NA	NA
P07737	Profilin-1 OS=Homo sapiens GN=PFN1 PE=1 SV=2	3.49159	NA	2.09236	NA
Q15848	Adiponectin OS=Homo sapiens GN=ADIPOQ PE=1 SV=1	0.751029	0.215747	0.991433	0.962517
Q13103	Secreted phosphoprotein 24 OS=Homo sapiens GN=SPP2 PE=1 SV=1	1.15561	0.540683	1.04475	0.853036
Q6J1Z7	Hemoglobin beta (Fragment) OS=Homo sapiens GN=HBB PE=3 SV=1	NA	NA	NA	NA
P06702	Protein S100-A9 OS=Homo sapiens GN=S100A9 PE=1 SV=1	3.85359	0.408965	2.48794	0.50402
P69891	Hemoglobin subunit gamma-1 OS=Homo sapiens GN=HBG1 PE=1 SV=2	4.38593	NA	2.41318	NA
S6AWF0	IgG H chain OS=Homo sapiens PE=2 SV=1	1.02922	0.937073	1.66712	0.222305
P02655	Apolipoprotein C-II OS=Homo sapiens GN=APOC2 PE=1 SV=1	1.69163	0.394378	1.56565	0.45973
P02748	Complement component C9 OS=Homo sapiens GN=C9 PE=1 SV=2	1.43535	0.0364378	1.17992	0.350866
C9JZW5	Major facilitator superfamily domain-containing protein 1 (Fragment) OS=Homo sapiens GN=MFSD1 PE=1 SV=2	NA	NA	NA	NA
A0A075B6H6	Ig kappa chain C region (Fragment) OS=Homo sapiens GN=IGKC PE=1 SV=1	1.31015	0.240346	1.41042	0.161392
P04180	Phosphatidylcholine-sterol acyltransferase OS=Homo sapiens GN=LCAT PE=1 SV=1	1.14254	0.397951	1.19218	0.267974
P25311	Zinc-alpha-2-glycoprotein OS=Homo sapiens GN=AZGP1 PE=1 SV=2	1.5236	0.126548	1.21861	0.434463
Q0ZCF6	Immunglobulin heavy chain variable region (Fragment) OS=Homo sapiens PE=4 SV=1	NA	NA	NA	NA
O00334	Phosphatidylinositol 3-kinase delta catalytic subunit OS=Homo sapiens PE=2 SV=1	NA	NA	NA	NA
P63167	Dynein light chain 1, cytoplasmic OS=Homo sapiens GN=DYNLL1 PE=1 SV=1	NA	NA	NA	NA
Q4TWB7	Beta globin (Fragment) OS=Homo sapiens GN=HBB PE=3 SV=1	1.75093	0.26407	1.03252	0.941012
P80723	Brain acid soluble protein 1 OS=Homo sapiens GN=BASP1 PE=1 SV=2	0.506696	NA	1.46263	NA
P20929	Nebulin OS=Homo sapiens GN=NEB PE=1 SV=5	NA	NA	NA	NA
P01623	Ig kappa chain V-III region WOL OS=Homo sapiens PE=1 SV=1	NA	NA	NA	NA
P21333	Filamin-A OS=Homo sapiens GN=FLNA PE=1 SV=4	4.96053	NA	1.8871	NA
Q6P5S8	IGK@ protein OS=Homo sapiens GN=IGK@ PE=1 SV=1	1.44929	0.291499	1.24543	0.486495
Q9P255	Zinc finger protein 492 OS=Homo sapiens GN=ZNF492 PE=2 SV=2	NA	NA	NA	NA
Q96RW6	IAP-like protein 3 OS=Homo sapiens GN=ILP3 PE=4 SV=1	NA	NA	NA	NA
Q59EB6	Complement component 1, q subcomponent, receptor 1 variant (Fragment) OS=Homo sapiens PE=2 SV=1	1.09895	0.621758	0.738834	0.130272
A8K5J8	cDNA FLJ75066, highly similar to Homo sapiens complement component 1, r subcomponent (C1R), mRNA OS=Homo sapiens PE=2 SV=1	0.867799	NA	0.942344	NA
Q6ZRV2	Protein FAM83H OS=Homo sapiens GN=FAM83H PE=1 SV=3	NA	NA	NA	NA
Q96GW7	Brevican core protein OS=Homo sapiens GN=BCAN PE=1 SV=2	NA	NA	NA	NA
A0A0X9T7T4	MS-D3 heavy chain variable region (Fragment) OS=Homo sapiens PE=2 SV=1	2.08484	NA	2.31446	NA
P07996	Thrombospondin-1 OS=Homo sapiens GN=THBS1 PE=1 SV=2	1.94805	0.111485	0.599829	NA
A2NYV4	Light chain Fab (Fragment) OS=Homo sapiens PE=2 SV=1	1.79567	0.270494	1.90419	0.229267
L8E853	von Willebrand factor OS=Homo sapiens GN=VWF PE=4 SV=1	1.26939	0.546879	1.29709	0.474752
S6BGE9	IgG L chain OS=Homo sapiens PE=2 SV=1	1.70856	0.239865	1.57778	0.272778
Q5EFE6	Anti-RhD monoclonal T125 kappa light chain OS=Homo sapiens PE=2 SV=1	1.85778	0.380933	2.05727	0.334588
Q12805	EGF-containing fibulin-like extracellular matrix protein 1 OS=Homo sapiens GN=EFEMP1 PE=1 SV=2	1.17998	0.61925	1.21286	0.57195
Q0ZCG6	Immunglobulin heavy chain variable region (Fragment) OS=Homo sapiens PE=4 SV=1	1.04747	NA	1.65915	NA
P01621	Ig kappa chain V-III region NG9 (Fragment) OS=Homo sapiens PE=2 SV=1	NA	NA	NA	NA
Q6N093	Putative uncharacterized protein DKFZp686I04196 (Fragment) OS=Homo sapiens GN=DKFZp686I04196 PE=2 SV=1	1.71761	0.218283	1.47401	0.321747
Q9UL85	Myosin-reactive immunoglobulin kappa chain variable region (Fragment) OS=Homo sapiens PE=2 SV=1	NA	NA	NA	NA
P01776	Ig heavy chain V-III region WAS OS=Homo sapiens PE=1 SV=1	0.729253	NA	0.783432	NA
A0A0A0MT89	Protein IGKJ1 (Fragment) OS=Homo sapiens GN=IGKJ1 PE=4 SV=1	1.07768	NA	1.22512	NA
P01023	Alpha-2-macroglobulin OS=Homo sapiens GN=A2M PE=1 SV=3	0.981154	0.861125	1.08099	0.448286
P40197	Platelet glycoprotein V OS=Homo sapiens GN=GP5 PE=1 SV=1	1.55343	NA	1.22706	NA
Q6N095	Uncharacterized protein OS=Homo sapiens GN=DKFZp686K03196 PE=1 SV=1	0.96255	0.931748	0.852445	0.72591
Q8NEJ1	Uncharacterized protein OS=Homo sapiens PE=2 SV=1	0.686604	0.143503	0.90156	0.525874
Q494V2	Cilia- and flagella-associated protein 100 OS=Homo sapiens GN=CFAP100 PE=2 SV=1	NA	NA	NA	NA
A0A0D9SFG0	Layilin (Fragment) OS=Homo sapiens GN=LAYN PE=4 SV=1	NA	NA	NA	NA
S6BGF9	IgG L chain OS=Homo sapiens PE=2 SV=1	NA	NA	NA	NA
C9YSQ4	MHC class I antigen (Fragment) OS=Homo sapiens GN=HLA-B PE=3 SV=1	NA	NA	NA	NA
Q6N041	Putative uncharacterized protein DKFZp686O16217 (Fragment) OS=Homo sapiens GN=DKFZp686O16217 PE=2 SV=1	2.5779	NA	1.38583	NA
P00738	Haptoglobin OS=Homo sapiens GN=HP PE=1 SV=1	1.38754	0.0396796	1.51448	0.0215565
Q6IN99	IGL@ protein OS=Homo sapiens GN=IGL@ PE=2 SV=1	2.43684	NA	2.84243	NA
H0Y3R5	Bcl-2-like protein 13 (Fragment) OS=Homo sapiens GN=BCL2L13 PE=1 SV=1	NA	NA	NA	NA
H0YAC1	Plasma kallikrein (Fragment) OS=Homo sapiens GN=KLKB1 PE=1 SV=1	0.814044	NA	0.727457	NA
P01612	Ig kappa chain V-I region Mev OS=Homo sapiens PE=1 SV=1	2.01782	0.310177	2.08117	0.300903
P01011	Alpha-1-antichymotrypsin OS=Homo sapiens GN=SERPINA3 PE=1 SV=2	1.49505	NA	1.30394	0.090527
P06396	Gelsolin OS=Homo sapiens GN=GSN PE=1 SV=1	0.702381	0.00669761	0.871591	0.261048
P02652	Apolipoprotein A-II OS=Homo sapiens GN=APOA2 PE=1 SV=1	0.846322	0.0552291	1.00447	0.960403
P01031	Complement C5 OS=Homo sapiens GN=C5 PE=1 SV=4	0.960877	0.641832	0.745443	0.00191989
A0A0B4J1V0	Protein IGHV3-15 (Fragment) OS=Homo sapiens GN=IGHV3-15 PE=1 SV=1	0.732029	NA	0.815096	NA
Q9NW36	Lymphoid-specific helicase OS=Homo sapiens GN=HELLS PE=1 SV=1	1.0573	0.780822	1.14482	0.516661
S6BGE0	IgG H chain OS=Homo sapiens PE=2 SV=1	0.13856	NA	2.70709	NA
B4DRF2	cDNA FLJ58124, highly similar to Complement factor I (EC 3.4.21.45) OS=Homo sapiens PE=2 SV=1	1.06346	NA	1.10668	NA
P36955	Pigment epithelium-derived factor OS=Homo sapiens GN=SERPINF1 PE=1 SV=4	0.763027	0.0216823	0.829918	0.121061
B3KRK8	cDNA FLJ34494 fis, clone HLUNG2005030, highly similar to VIMENTIN OS=Homo sapiens PE=2 SV=1	3.28065	NA	1.4901	NA
P61769	Beta-2-microglobulin OS=Homo sapiens GN=B2M PE=1 SV=1	9.34687	NA	6.91705	NA
Q6P089	IGH@ protein OS=Homo sapiens GN=IGH@ PE=2 SV=1	1.37634	0.124603	0.855959	0.517329
M0QZP7	ATP synthase subunit s-like protein (Fragment) OS=Homo sapiens GN=ATP5SL PE=1 SV=1	NA	NA	NA	NA
H0Y8P3	LIM and calponin homology domains-containing protein 1 (Fragment) OS=Homo sapiens GN=LIMCH1 PE=1 SV=1	NA	NA	NA	NA
P53794	Sodium/myo-inositol cotransporter OS=Homo sapiens GN=SLC5A3 PE=1 SV=2	NA	NA	NA	NA
P02654	Apolipoprotein C-I OS=Homo sapiens GN=APOC1 PE=1 SV=1	0.731608	0.0563763	0.725803	0.0573323
Q9UGP3	Immunoblobulin heavy chain (Fragment) OS=Homo sapiens GN=IgH PE=2 SV=1	NA	NA	NA	NA
Q96IC2	Putative RNA exonuclease NEF-sp OS=Homo sapiens GN=44M2.3 PE=2 SV=1	NA	NA	NA	NA
Q0ZCH8	Immunglobulin heavy chain variable region (Fragment) OS=Homo sapiens PE=4 SV=1	NA	NA	NA	NA
P69892	Hemoglobin subunit gamma-2 OS=Homo sapiens GN=HBG2 PE=1 SV=2	2.89777	NA	0.179484	NA
Q86VB7	Scavenger receptor cysteine-rich type 1 protein M130 OS=Homo sapiens GN=CD163 PE=1 SV=2	NA	NA	NA	NA
A0A0X9SZU9	MS-B1 heavy chain variable region (Fragment) OS=Homo sapiens PE=2 SV=1	2.90978	0.127581	2.50726	NA
A0A0C4DH31	Protein IGHV1-18 (Fragment) OS=Homo sapiens GN=IGHV1-18 PE=1 SV=1	1.99925	NA	1.65652	NA
Q9Y485	DmX-like protein 1 OS=Homo sapiens GN=DMXL1 PE=1 SV=3	NA	NA	NA	NA
P01601	Ig kappa chain V-ID region 16 (Fragment) OS=Homo sapiens GN=IGKV1D-16 PE=4 SV=2	2.12995	0.3502	1.53608	0.538836
P27918	Properdin OS=Homo sapiens GN=CFP PE=1 SV=2	0.614767	0.0365807	0.645088	0.0397395
A0A075B6Z1	Protein TRAJ20 (Fragment) OS=Homo sapiens GN=TRAJ20 PE=4 SV=1	NA	NA	NA	NA
Q9GZL9	Beta-globin (Fragment) OS=Homo sapiens GN=HBB PE=3 SV=1	NA	NA	NA	NA
B3VL12	Truncated beta globin OS=Homo sapiens PE=3 SV=1	NA	NA	NA	NA
A0A109PVK5	GCT-A6 heavy chain variable region (Fragment) OS=Homo sapiens PE=2 SV=1	NA	NA	NA	NA
Q8NBP7	Proprotein convertase subtilisin/kexin type 9 OS=Homo sapiens GN=PCSK9 PE=1 SV=3	1.48663	NA	NA	NA
Q6UXB8	Peptidase inhibitor 16 OS=Homo sapiens GN=PI16 PE=1 SV=1	1.17418	0.619192	1.22269	0.544925
Q8NI77	Kinesin-like protein KIF18A OS=Homo sapiens GN=KIF18A PE=1 SV=2	NA	NA	NA	NA
A2NYV0	Heavy chain Fab (Fragment) OS=Homo sapiens PE=2 SV=1	NA	NA	NA	NA
P06311	Ig kappa chain V-III region IARC/BL41 OS=Homo sapiens PE=4 SV=1	1.14594	0.542143	1.68586	0.0563597
A0N5G3	Rheumatoid factor G9 light chain (Fragment) OS=Homo sapiens GN=V<lambda>3 PE=2 SV=1	1.43623	0.41495	1.50683	0.370561
A0A0X9V981	MS-A2 light chain variable region (Fragment) OS=Homo sapiens PE=2 SV=1	1.12273	0.685983	1.26921	0.475514
P00739	Haptoglobin-related protein OS=Homo sapiens GN=HPR PE=2 SV=2	1.15384	0.349027	1.07127	0.646526
Q6GMX6	IGH@ protein OS=Homo sapiens GN=IGH@ PE=1 SV=1	5.35007	0.354814	1.67109	0.560376
Q6MZV6	Putative uncharacterized protein DKFZp686L19235 OS=Homo sapiens GN=DKFZp686L19235 PE=2 SV=1	NA	NA	NA	NA
Q9UL84	Myosin-reactive immunoglobulin heavy chain variable region (Fragment) OS=Homo sapiens PE=2 SV=1	NA	NA	NA	NA
Q53HU9	Complement component 1, r subcomponent variant (Fragment) OS=Homo sapiens PE=2 SV=1	0.774425	0.157203	0.716755	0.00743909
P04626	Receptor tyrosine-protein kinase erbB-2 OS=Homo sapiens GN=ERBB2 PE=1 SV=1	NA	NA	NA	NA
Q68DQ2	Very large A-kinase anchor protein OS=Homo sapiens GN=CRYBG3 PE=1 SV=3	NA	NA	NA	NA
A0A0B4J1V6	Protein IGHV3-73 (Fragment) OS=Homo sapiens GN=IGHV3-73 PE=1 SV=1	1.64795	0.272513	2.85061	0.0887867
Q9UK73	Protein fem-1 homolog B OS=Homo sapiens GN=FEM1B PE=1 SV=1	NA	NA	NA	NA
Q96PD5	N-acetylmuramoyl-L-alanine amidase OS=Homo sapiens GN=PGLYRP2 PE=1 SV=1	0.821701	0.0573833	0.931794	0.511711
P48304	Lithostathine-1-beta OS=Homo sapiens GN=REG1B PE=1 SV=1	5.03983	NA	3.37367	NA
Q92954	Proteoglycan 4 OS=Homo sapiens GN=PRG4 PE=1 SV=2	1.01921	0.924974	1.08602	0.657161
A2N0U6	VH6DJ protein (Fragment) OS=Homo sapiens GN=VH6DJ PE=2 SV=1	NA	NA	NA	NA
Q8TD30	Alanine aminotransferase 2 OS=Homo sapiens GN=GPT2 PE=1 SV=1	NA	NA	NA	NA
P35968	Vascular endothelial growth factor receptor 2 OS=Homo sapiens GN=KDR PE=1 SV=2	NA	NA	NA	NA
P35858	Insulin-like growth factor-binding protein complex acid labile subunit OS=Homo sapiens GN=IGFALS PE=1 SV=1	0.847227	0.0562614	0.841919	0.0810324
P08294	Extracellular superoxide dismutase [Cu-Zn] OS=Homo sapiens GN=SOD3 PE=1 SV=2	2.6014	0.48472	2.153	0.540625
B7Z7N9	cDNA FLJ60955, highly similar to Caspase recruitment domain-containing protein 8 OS=Homo sapiens PE=2 SV=1	NA	NA	NA	NA
P05543	Thyroxine-binding globulin OS=Homo sapiens GN=SERPINA7 PE=1 SV=2	1.04889	NA	1.06671	0.605656
P00748	Coagulation factor XII OS=Homo sapiens GN=F12 PE=1 SV=3	0.773833	0.0108384	0.889035	0.312433
P78563	Double-stranded RNA-specific editase 1 OS=Homo sapiens GN=ADARB1 PE=1 SV=1	NA	NA	NA	NA
P43251	Biotinidase OS=Homo sapiens GN=BTD PE=1 SV=2	0.972206	0.822902	0.881619	0.333322
P19823	Inter-alpha-trypsin inhibitor heavy chain H2 OS=Homo sapiens GN=ITIH2 PE=1 SV=2	0.906201	NA	0.904096	NA
A1L4H1	Soluble scavenger receptor cysteine-rich domain-containing protein SSC5D OS=Homo sapiens GN=SSC5D PE=1 SV=3	NA	NA	NA	NA
H0YKQ5	Kinesin-like protein (Fragment) OS=Homo sapiens GN=KIF23 PE=1 SV=1	NA	NA	NA	NA
H0YDA6	Nicotinate phosphoribosyltransferase (Fragment) OS=Homo sapiens GN=NAPRT PE=1 SV=1	NA	NA	NA	NA
A2KBC6	Anti-FactorVIII scFv (Fragment) OS=Homo sapiens PE=2 SV=1	0.875327	NA	1.63518	NA
A0A087WWF0	Protein IGHV3-64 OS=Homo sapiens GN=IGHV3-64 PE=1 SV=1	2.15559	NA	1.99738	NA
Q8N5F4	IGL@ protein OS=Homo sapiens GN=IGL@ PE=1 SV=1	NA	NA	NA	NA
Q7Z2U7	Uncharacterized protein OS=Homo sapiens PE=2 SV=1	0.551495	NA	1.94115	NA
Q8NH04	Olfactory receptor 2T27 OS=Homo sapiens GN=OR2T27 PE=3 SV=1	NA	NA	NA	NA
A0A5E4	Uncharacterized protein OS=Homo sapiens PE=2 SV=1	1.14024	NA	1.20957	NA
A2NXP8	Heavy chain variable region (Fragment) OS=Homo sapiens PE=2 SV=1	1.51339	NA	2.20416	NA
H0YI75	Sodium/potassium/calcium exchanger 6, mitochondrial (Fragment) OS=Homo sapiens GN=SLC8B1 PE=1 SV=1	NA	NA	NA	NA
P01593	Ig kappa chain V-I region AG OS=Homo sapiens PE=1 SV=1	3.32764	NA	1.77752	NA
A0A0C4DH25	Protein IGKV3D-20 (Fragment) OS=Homo sapiens GN=IGKV3D-20 PE=1 SV=1	1.78748	0.166462	1.58675	0.234301
A1X283	SH3 and PX domain-containing protein 2B OS=Homo sapiens GN=SH3PXD2B PE=1 SV=3	NA	NA	NA	NA
P15151	Poliovirus receptor OS=Homo sapiens GN=PVR PE=1 SV=2	NA	NA	NA	NA
Q53H26	Transferrin variant (Fragment) OS=Homo sapiens PE=2 SV=1	0.635104	0.0690366	0.838841	0.455008
Q5CZC0	Fibrous sheath-interacting protein 2 OS=Homo sapiens GN=FSIP2 PE=2 SV=4	NA	NA	NA	NA
P23083	Ig heavy chain V-I region V35 OS=Homo sapiens PE=1 SV=1	1.13263	NA	1.7139	NA
P53677	AP-3 complex subunit mu-2 OS=Homo sapiens GN=AP3M2 PE=2 SV=1	NA	NA	NA	NA
Q15014	Mortality factor 4-like protein 2 OS=Homo sapiens GN=MORF4L2 PE=1 SV=1	NA	NA	NA	NA
P04004	Vitronectin OS=Homo sapiens GN=VTN PE=1 SV=1	0.994274	0.944997	0.948293	0.564222
S6C4S0	IgG H chain OS=Homo sapiens PE=1 SV=1	1.28894	0.233491	1.28445	0.254018
A2N0U5	VH6DJ protein (Fragment) OS=Homo sapiens GN=VH6DJ PE=2 SV=1	NA	NA	NA	NA
Q15828	Cystatin-M OS=Homo sapiens GN=CST6 PE=1 SV=1	2.55889	NA	1.46001	NA
P02746	Complement C1q subcomponent subunit B OS=Homo sapiens GN=C1QB PE=1 SV=3	0.731987	0.0958775	0.88849	0.152445
P01780	Ig heavy chain V-III region JON OS=Homo sapiens PE=1 SV=1	0.921991	0.788749	1.00567	0.985221
Q14333	Facioscapulohumeral muscular dystrophy OS=Homo sapiens GN=FSHD PE=4 SV=1	NA	NA	NA	NA
P02671	Fibrinogen alpha chain OS=Homo sapiens GN=FGA PE=1 SV=2	0.648617	NA	0.778241	0.56251
A0A125U0U6	MS-A4 light chain variable region (Fragment) OS=Homo sapiens PE=2 SV=1	2.66132	0.275523	2.09986	0.34654
Q86XQ3	Cation channel sperm-associated protein 3 OS=Homo sapiens GN=CATSPER3 PE=2 SV=1	NA	NA	NA	NA
P49221	Protein-glutamine gamma-glutamyltransferase 4 OS=Homo sapiens GN=TGM4 PE=1 SV=2	NA	NA	NA	NA
Q6GMW4	IGL@ protein OS=Homo sapiens GN=IGL@ PE=2 SV=1	NA	NA	NA	NA
C0JYY2	Apolipoprotein B (Including Ag(X) antigen) OS=Homo sapiens GN=APOB PE=4 SV=1	1.03741	0.835308	0.869892	0.389506
A2NJV5	Kappa light chain variable region (Fragment) OS=Homo sapiens GN=IGKV A18 PE=4 SV=1	0.946743	0.617978	1.03813	0.768034
P01781	Ig heavy chain V-III region GAL OS=Homo sapiens PE=1 SV=1	1.96572	0.0749886	1.88331	0.0883623
Q9NW52	cDNA FLJ10314 fis, clone NT2RM2000374 OS=Homo sapiens PE=2 SV=1	NA	NA	NA	NA
A0A0J9YX35	Uncharacterized protein (Fragment) OS=Homo sapiens PE=1 SV=1	0.973262	0.95268	1.19429	0.735406
Q76LX8	A disintegrin and metalloproteinase with thrombospondin motifs 13 OS=Homo sapiens GN=ADAMTS13 PE=1 SV=1	NA	NA	NA	NA
Q9UNN8	Endothelial protein C receptor OS=Homo sapiens GN=PROCR PE=1 SV=1	0.627209	0.157034	1.15606	0.715356
H0YLF3	Beta-2-microglobulin (Fragment) OS=Homo sapiens GN=B2M PE=1 SV=1	NA	NA	NA	NA
Q6N091	Putative uncharacterized protein DKFZp686C02220 (Fragment) OS=Homo sapiens GN=DKFZp686C02220 PE=2 SV=1	1.36112	0.0619092	1.25523	0.129538
H0YG35	F-BAR and double SH3 domains protein 2 (Fragment) OS=Homo sapiens GN=FCHSD2 PE=1 SV=1	NA	NA	NA	NA
K7ENL6	Fas-binding factor 1 (Fragment) OS=Homo sapiens GN=FBF1 PE=1 SV=1	NA	NA	NA	NA
P04209	Ig lambda chain V-II region NIG-84 OS=Homo sapiens PE=1 SV=1	1.13695	0.682648	0.94184	0.868255
S6BGD4	IgG H chain OS=Homo sapiens PE=2 SV=1	1.89656	0.0864101	1.63818	0.163994
P08758	Annexin A5 OS=Homo sapiens GN=ANXA5 PE=1 SV=2	NA	NA	NA	NA
P61626	Lysozyme C OS=Homo sapiens GN=LYZ PE=1 SV=1	NA	NA	NA	NA
Q14624	Inter-alpha-trypsin inhibitor heavy chain H4 OS=Homo sapiens GN=ITIH4 PE=1 SV=4	1.09847	0.495047	1.24773	0.319187
H0YGR0	Integrin-alpha FG-GAP repeat-containing protein 2 (Fragment) OS=Homo sapiens GN=ITFG2 PE=1 SV=1	NA	NA	NA	NA
F4MH50	Ubiquitously transcribed tetratricopeptide repeat protein Y-linked transcript variant 51 OS=Homo sapiens GN=UTY PE=2 SV=1	NA	NA	NA	NA
Q15032	R3H domain-containing protein 1 OS=Homo sapiens GN=R3HDM1 PE=1 SV=3	NA	NA	NA	NA
P78527	DNA-dependent protein kinase catalytic subunit OS=Homo sapiens GN=PRKDC PE=1 SV=3	NA	NA	NA	NA
A0M8Q7	V2-1 protein (Fragment) OS=Homo sapiens GN=V2-1 PE=4 SV=1	6.8934	NA	4.27044	NA
P02545	Prelamin-A/C OS=Homo sapiens GN=LMNA PE=1 SV=1	NA	NA	NA	NA
P19652	Alpha-1-acid glycoprotein 2 OS=Homo sapiens GN=ORM2 PE=1 SV=2	1.37786	0.0694797	1.08832	0.582189
Q68CN4	Uncharacterized protein OS=Homo sapiens GN=DKFZp686E23209 PE=1 SV=2	0.742477	NA	0.775695	NA
Q38SD2	Leucine-rich repeat serine/threonine-protein kinase 1 OS=Homo sapiens GN=LRRK1 PE=1 SV=3	NA	NA	NA	NA
Q5NV84	V1-3 protein (Fragment) OS=Homo sapiens GN=V1-3 PE=4 SV=1	1.70312	0.312986	1.97216	NA
Q9H307	Pinin OS=Homo sapiens GN=PNN PE=1 SV=4	NA	NA	NA	NA
P07359	Platelet glycoprotein Ib alpha chain OS=Homo sapiens GN=GP1BA PE=1 SV=2	1.10688	0.717143	1.02083	0.938116
P01241	Somatotropin OS=Homo sapiens GN=GH1 PE=1 SV=2	NA	NA	NA	NA
S6B2B6	IgG H chain OS=Homo sapiens PE=2 SV=1	1.92587	NA	1.30832	NA
O15014	Zinc finger protein 609 OS=Homo sapiens GN=ZNF609 PE=1 SV=2	0.902458	NA	0.797151	NA
P02751	Fibronectin OS=Homo sapiens GN=FN1 PE=1 SV=4	1.08576	0.826241	0.798464	0.510636
P03952	Plasma kallikrein OS=Homo sapiens GN=KLKB1 PE=1 SV=1	0.963516	0.738731	0.88441	0.289117
A0A087X0Q4	Protein IGKV2-40 OS=Homo sapiens GN=IGKV2-40 PE=1 SV=1	1.41452	0.26615	1.30225	0.437104
S6BAR0	IgG L chain OS=Homo sapiens PE=2 SV=1	1.56	0.298218	0.318851	0.267021
Q96KN2	Beta-Ala-His dipeptidase OS=Homo sapiens GN=CNDP1 PE=1 SV=4	1.16826	0.31816	1.11301	0.412868
Q6P2J1	Uncharacterized protein OS=Homo sapiens PE=2 SV=1	NA	NA	NA	NA
A8K008	Uncharacterized protein OS=Homo sapiens PE=1 SV=1	NA	NA	NA	NA
A0A0A0MS14	Protein IGHV1-45 (Fragment) OS=Homo sapiens GN=IGHV1-45 PE=1 SV=1	1.59475	0.0559861	1.27379	0.222494
B7Z8V7	NAD kinase 2, mitochondrial OS=Homo sapiens GN=NADK2 PE=1 SV=1	3.23575	NA	0.603965	NA
Q5VWM6	Putative PRAME family member 13 OS=Homo sapiens GN=PRAMEF13 PE=5 SV=2	NA	NA	NA	NA
A8K9M4	cDNA FLJ75539, highly similar to Homo sapiens apolipoprotein A-V (APOA5) gene OS=Homo sapiens PE=2 SV=1	0.640389	NA	1.33064	NA
E9PMT2	LIM domain only protein 7 OS=Homo sapiens GN=LMO7 PE=1 SV=1	NA	NA	NA	NA
P04431	Ig kappa chain V-I region Walker OS=Homo sapiens PE=1 SV=1	0.849272	NA	1.99851	NA
A0A087WSY6	Protein IGKV3D-15 (Fragment) OS=Homo sapiens GN=IGKV3D-15 PE=1 SV=5	NA	NA	NA	NA
P08473	Neprilysin OS=Homo sapiens GN=MME PE=1 SV=2	NA	NA	NA	NA
Q9P1C5	PRO2769 OS=Homo sapiens PE=2 SV=1	9.12238	NA	8.12769	NA
P06213	Insulin receptor OS=Homo sapiens GN=INSR PE=1 SV=4	1.32042	NA	1.22817	NA
Q1HP67	Lipoprotein, Lp(A) OS=Homo sapiens GN=LPA PE=3 SV=1	0.440225	NA	0.311596	NA
V9H1D9	Alpha globin OS=Homo sapiens PE=3 SV=1	NA	NA	NA	NA
A0A126LAX7	U26 OS=Homo sapiens GN=U26 PE=4 SV=1	NA	NA	NA	NA
A0A068LL60	Ig heavy chain variable region (Fragment) OS=Homo sapiens PE=2 SV=1	3.57266	NA	1.81056	NA
P80192	Mitogen-activated protein kinase kinase kinase 9 OS=Homo sapiens GN=MAP3K9 PE=1 SV=3	NA	NA	NA	NA
P00742	Coagulation factor X OS=Homo sapiens GN=F10 PE=1 SV=2	1.09042	0.502852	0.995415	0.968202
Q5NV79	V5-4 protein (Fragment) OS=Homo sapiens GN=V5-4 PE=4 SV=1	3.99695	0.206975	1.81803	0.428534
P00915	Carbonic anhydrase 1 OS=Homo sapiens GN=CA1 PE=1 SV=2	2.59216	0.117293	1.13321	0.77116
O14791	Apolipoprotein L1 OS=Homo sapiens GN=APOL1 PE=1 SV=5	0.931937	0.445915	1.19277	0.282601
Q9Y490	Talin-1 OS=Homo sapiens GN=TLN1 PE=1 SV=3	1.11141	0.780086	0.97001	0.920899
P01765	Ig heavy chain V-III region TIL OS=Homo sapiens PE=1 SV=1	1.06174	0.794981	1.33207	0.333293
P01703	Ig lambda chain V-I region NEWM OS=Homo sapiens PE=1 SV=1	1.57454	NA	1.13992	NA
O43781	Dual specificity tyrosine-phosphorylation-regulated kinase 3 OS=Homo sapiens GN=DYRK3 PE=2 SV=3	NA	NA	NA	NA
Q9UFV3	Putative uncharacterized protein DKFZp434L187 OS=Homo sapiens PE=5 SV=2	NA	NA	NA	NA
P22059	Oxysterol-binding protein 1 OS=Homo sapiens GN=OSBP PE=1 SV=1	NA	NA	NA	NA
A2NV54	Precursor (AA -19 to 108) (Fragment) OS=Homo sapiens PE=2 SV=1	0.914112	0.85228	0.927603	0.875483
V9HW68	Epididymis luminal protein 214 OS=Homo sapiens GN=HEL-214 PE=2 SV=1	1.98639	NA	1.80016	NA
P04278	Sex hormone-binding globulin OS=Homo sapiens GN=SHBG PE=1 SV=2	1.24911	0.373638	1.49216	0.144988
P13796	Plastin-2 OS=Homo sapiens GN=LCP1 PE=1 SV=6	1.21131	0.596153	1.44855	0.331808
G3V5N9	Proto-oncogene c-Fos (Fragment) OS=Homo sapiens GN=FOS PE=4 SV=1	NA	NA	NA	NA
Q6NS95	IGL@ protein OS=Homo sapiens GN=IGL@ PE=2 SV=1	NA	NA	NA	NA
A0A075B7D0	Protein IGHV1OR15-1 (Fragment) OS=Homo sapiens GN=IGHV1OR15-1 PE=4 SV=1	2.20748	0.0172516	2.13537	0.0193032
P01616	Ig kappa chain V-II region MIL OS=Homo sapiens PE=1 SV=1	1.02923	0.932904	1.39457	0.412053
P07357	Complement component C8 alpha chain OS=Homo sapiens GN=C8A PE=1 SV=2	0.963845	0.668707	0.922019	0.386741
Q9UNN5	FAS-associated factor 1 OS=Homo sapiens GN=FAF1 PE=1 SV=2	1.22015	0.111655	1.34275	0.0666268
P04264	Keratin, type II cytoskeletal 1 OS=Homo sapiens GN=KRT1 PE=1 SV=6	1.70864	0.364048	0.587742	0.265948
P01707	Ig lambda chain V-II region TRO OS=Homo sapiens PE=1 SV=1	0.512941	NA	1.44419	NA
A0N7I9	F5-20 (Fragment) OS=Homo sapiens GN=F5-20 PE=2 SV=1	1.33861	0.680102	5.78419	0.178903
A2NUT2	Lambda-chain (AA -20 to 215) OS=Homo sapiens PE=1 SV=1	NA	NA	NA	NA
Q5NV62	V3-4 protein (Fragment) OS=Homo sapiens GN=V3-4 PE=4 SV=1	NA	NA	NA	NA
Q99643	Succinate dehydrogenase cytochrome b560 subunit, mitochondrial OS=Homo sapiens GN=SDHC PE=1 SV=1	NA	NA	NA	NA
K7EIU2	Serine/threonine-protein kinase ULK2 (Fragment) OS=Homo sapiens GN=ULK2 PE=1 SV=7	NA	NA	NA	NA
Q86UT5	Na(+)/H(+) exchange regulatory cofactor NHE-RF4 OS=Homo sapiens GN=PDZD3 PE=1 SV=2	NA	NA	NA	NA
Q07954	Prolow-density lipoprotein receptor-related protein 1 OS=Homo sapiens GN=LRP1 PE=1 SV=2	NA	NA	NA	NA
P02790	Hemopexin OS=Homo sapiens GN=HPX PE=1 SV=2	1.27133	0.0622771	1.10816	0.365086
Q14766	Latent-transforming growth factor beta-binding protein 1 OS=Homo sapiens GN=LTBP1 PE=1 SV=4	1.38047	NA	0.826935	NA
Q96EE4	Coiled-coil domain-containing protein 126 OS=Homo sapiens GN=CCDC126 PE=2 SV=2	2.20694	NA	0.785775	NA
Q9UGM5	Fetuin-B OS=Homo sapiens GN=FETUB PE=1 SV=2	1.07704	0.581068	1.12006	0.351465
O60683	Peroxisome biogenesis factor 10 OS=Homo sapiens GN=PEX10 PE=1 SV=1	NA	NA	NA	NA
Q96SA9	Anti-streptococcal/anti-myosin immunoglobulin kappa light chain variable region (Fragment) OS=Homo sapiens PE=2 SV=1	3.71901	0.0113634	1.91432	0.105938
O94819	Kelch repeat and BTB domain-containing protein 11 OS=Homo sapiens GN=KBTBD11 PE=1 SV=1	NA	NA	NA	NA
Q96MK9	HCG2002544 OS=Homo sapiens GN=hCG_2002544 PE=2 SV=1	NA	NA	NA	NA
P04196	Histidine-rich glycoprotein OS=Homo sapiens GN=HRG PE=1 SV=1	0.627528	0.194155	0.701678	0.263033
A2J1N6	Rheumatoid factor RF-ET9 (Fragment) OS=Homo sapiens PE=2 SV=1	1.45162	0.397968	2.2279	0.162453
Q9UL83	Myosin-reactive immunoglobulin light chain variable region (Fragment) OS=Homo sapiens PE=2 SV=1	1.52682	0.164774	1.20715	0.445686
A0A0B4J1U9	Protein IGHV3-11 (Fragment) OS=Homo sapiens GN=IGHV3-11 PE=1 SV=1	0.970382	NA	1.01467	NA
P80419	Ig heavy chain V-III region GAR OS=Homo sapiens PE=1 SV=1	1.21137	NA	1.94432	NA
Q9P2D1	Chromodomain-helicase-DNA-binding protein 7 OS=Homo sapiens GN=CHD7 PE=1 SV=3	NA	NA	NA	NA
Q8IZD8	Anti-thyroglobulin light chain variable region (Fragment) OS=Homo sapiens PE=2 SV=1	1.00105	0.990387	0.520597	0.0165866
P26927	Hepatocyte growth factor-like protein OS=Homo sapiens GN=MST1 PE=1 SV=2	0.917835	0.609417	0.855864	0.345141
P13591	Neural cell adhesion molecule 1 OS=Homo sapiens GN=NCAM1 PE=1 SV=3	NA	NA	NA	NA
S6BAM6	IgG H chain OS=Homo sapiens PE=2 SV=1	NA	NA	NA	NA
Q99575	Ribonucleases P/MRP protein subunit POP1 OS=Homo sapiens GN=POP1 PE=1 SV=2	NA	NA	NA	NA
B8ZZW7	Prothymosin alpha OS=Homo sapiens GN=PTMA PE=1 SV=1	NA	NA	NA	NA
Q9UGI0	Ubiquitin thioesterase ZRANB1 OS=Homo sapiens GN=ZRANB1 PE=1 SV=2	NA	NA	NA	NA
P43405	Tyrosine-protein kinase SYK OS=Homo sapiens GN=SYK PE=1 SV=1	NA	NA	NA	NA
P02747	Complement C1q subcomponent subunit C OS=Homo sapiens GN=C1QC PE=1 SV=3	1.01922	0.876116	0.84404	0.0719691
A2J1M5	Rheumatoid factor RF-IP4 (Fragment) OS=Homo sapiens PE=2 SV=1	1.08837	0.83842	1.38834	0.482983
P01767	Ig heavy chain V-III region BUT OS=Homo sapiens PE=1 SV=1	1.51042	0.3204	1.82958	0.193996
Q9Y5Y7	Lymphatic vessel endothelial hyaluronic acid receptor 1 OS=Homo sapiens GN=LYVE1 PE=1 SV=2	1.42853	0.569664	1.57413	0.489549
Q15413	Ryanodine receptor 3 OS=Homo sapiens GN=RYR3 PE=1 SV=3	NA	NA	NA	NA
Q92496	Complement factor H-related protein 4 OS=Homo sapiens GN=CFHR4 PE=1 SV=3	3.60853	NA	1.77898	NA
P02765	Alpha-2-HS-glycoprotein OS=Homo sapiens GN=AHSG PE=1 SV=1	0.843994	0.115637	0.912229	0.343785
A8K575	cDNA FLJ76190, highly similar to Homo sapiens START domain containing 7 (STARD7), transcript variant 1, mRNA OS=Homo sapiens PE=2 SV=1	NA	NA	NA	NA
P62273	40S ribosomal protein S29 OS=Homo sapiens GN=RPS29 PE=1 SV=2	NA	NA	NA	NA
B2RMS9	Inter-alpha (Globulin) inhibitor H4 (Plasma Kallikrein-sensitive glycoprotein) OS=Homo sapiens GN=ITIH4 PE=2 SV=1	1.15895	NA	0.766103	NA
B7ZLE5	FN1 protein OS=Homo sapiens GN=FN1 PE=2 SV=1	1.43058	0.317797	0.92505	0.776839
A0A125QYY3	GCT-A6 light chain variable region (Fragment) OS=Homo sapiens PE=2 SV=1	NA	NA	NA	NA
Q9UIF3	Tektin-2 OS=Homo sapiens GN=TEKT2 PE=1 SV=1	NA	NA	NA	NA
O00533	Neural cell adhesion molecule L1-like protein OS=Homo sapiens GN=CHL1 PE=1 SV=4	0.614487	NA	0.782685	NA
Q8TBD0	Uncharacterized protein (Fragment) OS=Homo sapiens PE=2 SV=1	2.67397	0.196235	2.91236	0.179016
J3QRT9	START domain containing 6, isoform CRA_b OS=Homo sapiens GN=STARD6 PE=4 SV=1	NA	NA	NA	NA
B3VL31	Beta globin (Fragment) OS=Homo sapiens PE=3 SV=1	2.96073	NA	2.00532	NA
Q9C0G0	Zinc finger protein 407 OS=Homo sapiens GN=ZNF407 PE=1 SV=2	NA	NA	NA	NA
P55058	Phospholipid transfer protein OS=Homo sapiens GN=PLTP PE=1 SV=1	0.836806	0.364977	0.880056	0.497307
P18065	Insulin-like growth factor-binding protein 2 OS=Homo sapiens GN=IGFBP2 PE=1 SV=2	2.62815	NA	2.15018	NA
O75037	Kinesin-like protein KIF21B OS=Homo sapiens GN=KIF21B PE=1 SV=2	NA	NA	NA	NA
A0A120HG46	GCT-A10 heavy chain variable region (Fragment) OS=Homo sapiens PE=2 SV=1	1.30034	NA	1.66376	NA
A0N5G1	Rheumatoid factor C6 light chain (Fragment) OS=Homo sapiens GN=V<kappa>1 PE=2 SV=1	1.52267	0.101837	1.56933	0.085591
A0A0B4J2D9	Protein IGKV1D-13 (Fragment) OS=Homo sapiens GN=IGKV1D-13 PE=1 SV=1	1.38567	0.41218	1.23523	0.61692
Q13093	Platelet-activating factor acetylhydrolase OS=Homo sapiens GN=PLA2G7 PE=1 SV=1	NA	NA	NA	NA
A2J1N8	Rheumatoid factor RF-ET11 (Fragment) OS=Homo sapiens PE=2 SV=1	1.32649	NA	NA	NA
Q9Y6R7	IgGFc-binding protein OS=Homo sapiens GN=FCGBP PE=1 SV=3	2.97036	NA	2.7156	NA
P00488	Coagulation factor XIII A chain OS=Homo sapiens GN=F13A1 PE=1 SV=4	0.647133	0.0472352	0.95505	0.862018
O75636	Ficolin-3 OS=Homo sapiens GN=FCN3 PE=1 SV=2	1.21214	0.308463	1.20547	0.296996
Q12955	Ankyrin-3 OS=Homo sapiens GN=ANK3 PE=1 SV=3	NA	NA	NA	NA
Q86XK9	ADAM7 protein (Fragment) OS=Homo sapiens GN=ADAM7 PE=2 SV=2	NA	NA	NA	NA
A0A109PT03	GCT-A9 heavy chain variable region (Fragment) OS=Homo sapiens PE=2 SV=1	2.17725	0.050795	1.80635	0.0995047
P31151	Protein S100-A7 OS=Homo sapiens GN=S100A7 PE=1 SV=4	10.5734	NA	9.02665	NA
P15144	Aminopeptidase N OS=Homo sapiens GN=ANPEP PE=1 SV=4	1.58314	NA	1.56165	NA
O95497	Pantetheinase OS=Homo sapiens GN=VNN1 PE=1 SV=2	3.19101	NA	1.02961	NA
Q9Y6L6	Solute carrier organic anion transporter family member 1B1 OS=Homo sapiens GN=SLCO1B1 PE=1 SV=2	NA	NA	NA	NA
Q96JH7	Deubiquitinating protein VCIP135 OS=Homo sapiens GN=VCPIP1 PE=1 SV=2	0.549784	NA	0.386488	NA
P05546	Heparin cofactor 2 OS=Homo sapiens GN=SERPIND1 PE=1 SV=3	0.992958	0.938294	1.09155	0.489157
Q96BW5	Phosphotriesterase-related protein OS=Homo sapiens GN=PTER PE=1 SV=1	NA	NA	NA	NA
Q96JB1	Dynein heavy chain 8, axonemal OS=Homo sapiens GN=DNAH8 PE=1 SV=2	NA	NA	NA	NA
P10909	Clusterin OS=Homo sapiens GN=CLU PE=1 SV=1	1.11846	0.149747	1.11165	0.154587
P02787	Serotransferrin OS=Homo sapiens GN=TF PE=1 SV=3	NA	NA	NA	NA
B7Z539	cDNA FLJ56954, highly similar to Inter-alpha-trypsin inhibitor heavy chain H1 OS=Homo sapiens PE=2 SV=1	0.84789	0.109071	0.915269	0.340476
P07333	Macrophage colony-stimulating factor 1 receptor OS=Homo sapiens GN=CSF1R PE=1 SV=2	0.926045	NA	1.04854	NA
P22891	Vitamin K-dependent protein Z OS=Homo sapiens GN=PROZ PE=1 SV=2	1.44545	0.32237	0.939973	0.836654
Q6ZVX0	cDNA FLJ41981 fis, clone SMINT2011888, highly similar to Protein Tro alpha1 H,myeloma OS=Homo sapiens PE=2 SV=1	0.6517	0.143679	0.933308	0.819536
A0A0X9T0H6	GCT-A5 heavy chain variable region (Fragment) OS=Homo sapiens PE=2 SV=1	1.28319	NA	0.693227	NA
P29083	General transcription factor IIE subunit 1 OS=Homo sapiens GN=GTF2E1 PE=1 SV=2	NA	NA	NA	NA
P57105	Synaptojanin-2-binding protein OS=Homo sapiens GN=SYNJ2BP PE=1 SV=2	NA	NA	NA	NA
A0A087WW89	Protein IGHV3-72 OS=Homo sapiens GN=IGHV3-72 PE=1 SV=1	1.45763	NA	1.26111	0.295678
P53355	Death-associated protein kinase 1 OS=Homo sapiens GN=DAPK1 PE=1 SV=6	NA	NA	NA	NA
P29622	Kallistatin OS=Homo sapiens GN=SERPINA4 PE=1 SV=3	0.712143	0.000999447	0.769386	0.0171634
A8K6R5	cDNA FLJ77568 OS=Homo sapiens PE=2 SV=1	NA	NA	NA	NA
P04070	Vitamin K-dependent protein C OS=Homo sapiens GN=PROC PE=1 SV=1	1.13149	0.535296	1.04534	0.814736
Q13523	Serine/threonine-protein kinase PRP4 homolog OS=Homo sapiens GN=PRPF4B PE=1 SV=3	NA	NA	NA	NA
B2RCH7	cDNA, FLJ96082, highly similar to Homo sapiens cervical cancer 1 protooncogene (HCCR1), mRNA OS=Homo sapiens PE=2 SV=1	NA	NA	NA	NA
A0A0C4DH30	Protein IGHV3-16 (Fragment) OS=Homo sapiens GN=IGHV3-16 PE=1 SV=1	NA	NA	NA	NA
P49862	Kallikrein-7 OS=Homo sapiens GN=KLK7 PE=1 SV=1	NA	NA	NA	NA
O95705	Dynein, axonemal, heavy polypeptide 11 (DNAH11) (Fragment) OS=Homo sapiens GN=DNAH11 PE=4 SV=2	NA	NA	NA	NA
P01779	Ig heavy chain V-III region TUR OS=Homo sapiens PE=1 SV=1	NA	NA	NA	NA
H7C5J7	TPA-induced transmembrane protein (Fragment) OS=Homo sapiens GN=C3orf52 PE=1 SV=1	NA	NA	NA	NA
Q14019	Coactosin-like protein OS=Homo sapiens GN=COTL1 PE=1 SV=3	NA	NA	NA	NA
P29401	Transketolase OS=Homo sapiens GN=TKT PE=1 SV=3	NA	NA	NA	NA
P11021	78 kDa glucose-regulated protein OS=Homo sapiens GN=HSPA5 PE=1 SV=2	NA	NA	NA	NA
P04003	C4b-binding protein alpha chain OS=Homo sapiens GN=C4BPA PE=1 SV=2	1.15115	0.157312	0.993892	0.950666
P02786	Transferrin receptor protein 1 OS=Homo sapiens GN=TFRC PE=1 SV=2	1.18707	0.475465	1.18728	0.581819
P35527	Keratin, type I cytoskeletal 9 OS=Homo sapiens GN=KRT9 PE=1 SV=3	1.54533	0.521336	1.36729	0.622354
Q99683	Mitogen-activated protein kinase kinase kinase 5 OS=Homo sapiens GN=MAP3K5 PE=1 SV=1	NA	NA	NA	NA
P02768	Serum albumin OS=Homo sapiens GN=ALB PE=1 SV=2	0.713258	NA	0.594079	0.0585418
P04433	Ig kappa chain V-III region VG (Fragment) OS=Homo sapiens PE=1 SV=1	2.52588	NA	3.9887	NA
P22792	Carboxypeptidase N subunit 2 OS=Homo sapiens GN=CPN2 PE=1 SV=3	1.07228	0.314407	1.03454	0.635186
C9JC66	Solute carrier family 22 member 24 OS=Homo sapiens GN=SLC22A24 PE=4 SV=1	NA	NA	NA	NA
Q96JD0	Amyloid lambda 6 light chain variable region SAR (Fragment) OS=Homo sapiens PE=2 SV=1	NA	NA	NA	NA
A0A068LKQ8	Ig heavy chain variable region (Fragment) OS=Homo sapiens PE=2 SV=1	NA	NA	NA	NA
P00747	Plasminogen OS=Homo sapiens GN=PLG PE=1 SV=2	0.979053	0.64854	0.966901	0.47937
P01857	Ig gamma-1 chain C region OS=Homo sapiens GN=IGHG1 PE=1 SV=1	1.75211	NA	1.58008	NA
D3DQX7	Serum amyloid A protein OS=Homo sapiens GN=SAA1 PE=3 SV=1	3.4366	0.0797526	4.09593	0.0623
A0A0A0MTA3	Protein IGKJ5 (Fragment) OS=Homo sapiens GN=IGKJ5 PE=4 SV=1	0.539091	NA	2.61926	NA
P00450	Ceruloplasmin OS=Homo sapiens GN=CP PE=1 SV=1	1.24293	0.0201763	1.025	0.77801
A0A0X9UWK7	MS-D4 heavy chain variable region (Fragment) OS=Homo sapiens PE=2 SV=1	1.37199	0.235549	1.54673	0.135112
B2R582	cDNA, FLJ92374, highly similar to Homo sapiens C-type lectin domain family 3, member B (CLEC3B), mRNA OS=Homo sapiens PE=2 SV=1	0.658038	0.0741031	0.81543	0.462185
P83593	Ig kappa chain V-IV region STH (Fragment) OS=Homo sapiens PE=1 SV=1	0.620924	0.156443	0.659001	0.312817
P00734	Prothrombin OS=Homo sapiens GN=F2 PE=1 SV=2	0.95051	0.621507	0.950423	0.655339
